# Supplementary material for: Airway epithelial cell isolation techniques affect DNA methylation profiles with consequences for analysis of asthma related perturbations to DNA methylation
Source: PubMed Central journal article supplement (PMC6783553; doi:10.1038/s41598-019-50873-y), 2019-10-08
Supplement: 41598_2019_50873_MOESM1_ESM.pdf [file 41598_2019_50873_MOESM1_ESM.pdf]

## Supplementary Information

Airway epithelial cell Isolation technique affects DNA methylation profiles with consequences for analysis of asthma related perturbations to DNA methylation.

Rachel L. Clifford<sup>1,2\*</sup>, Jamie Patel<sup>1</sup>, Julia L. Maclsaac<sup>2</sup>, Lisa M. McEwen<sup>2</sup>, Simon Johnson<sup>1</sup>, Dominick Shaw<sup>1</sup>, Alan J. Knox<sup>1</sup>, Tillie-Louise Hackett<sup>3,4,#</sup>, Michael S. Kobor<sup>2,#</sup>.

**S1 Table: 111 CpG sites differentially methylated between airway epithelial cells isolated via pronase digestion versus bronchial brushing.**

| Probe ID          | P Value         | Benjamini Hochberg Adjusted P Value | Difference in beta value (pronase reference) | CpG Class | Distance to closest TSS | Closest TSS gene name |
|-------------------|-----------------|-------------------------------------|----------------------------------------------|-----------|-------------------------|-----------------------|
| cg12160637        | 1.54E-08        | 0.00331934                          | -0.16                                        | HC        | -358                    | HEYL                  |
| cg17804611        | 3.21E-08        | 0.00331934                          | -0.13                                        | IC        | -25988                  | AK093525              |
| <b>cg20295248</b> | <b>3.13E-08</b> | <b>0.00331934</b>                   | <b>0.27</b>                                  | <b>IC</b> | <b>-28</b>              | <b>LOC149837</b>      |
| <b>cg21235746</b> | <b>3.07E-08</b> | <b>0.00331934</b>                   | <b>0.28</b>                                  | <b>IC</b> | <b>98</b>               | <b>LOC149837</b>      |
| cg02363969        | 9.20E-08        | 0.00760334                          | -0.17                                        | LC        | 360                     | SBK2                  |
| cg03731235        | 1.23E-07        | 0.00846603                          | -0.17                                        | IC        | -139576                 | KBTBD8                |
| cg02790471        | 1.58E-07        | 0.00920754                          | -0.14                                        | IC        | 79                      | SCML4                 |
| cg16338365        | 1.78E-07        | 0.00920754                          | 0.20                                         | IC        | 11406                   | GPR31                 |
| cg04875514        | 2.46E-07        | 0.00923779                          | -0.20                                        | LC        | -126                    | SOAT2                 |
| cg15906733        | 2.33E-07        | 0.00923779                          | -0.16                                        | IC        | 32364                   | MIR2909               |
| cg19630374        | 2.23E-07        | 0.00923779                          | -0.13                                        | HC        | 1663                    | MYO15A                |
| cg01619416        | 5.82E-07        | 0.01218191                          | -0.14                                        | IC        | -11764                  | SSTR5                 |
| cg05695991        | 4.30E-07        | 0.01218191                          | -0.19                                        | IC        | 40041                   | LOC255512             |
| cg07964527        | 5.82E-07        | 0.01218191                          | -0.15                                        | LC        | 9659                    | PDE8A                 |
| cg08317694        | 3.76E-07        | 0.01218191                          | -0.15                                        | ICshore   | -521                    | CRABP1                |
| cg14952449        | 4.90E-07        | 0.01218191                          | -0.20                                        | LC        | 23722                   | BC032469              |
| cg17287034        | 5.89E-07        | 0.01218191                          | -0.22                                        | LC        | 179965                  | ADAM12                |
| cg18098004        | 5.48E-07        | 0.01218191                          | -0.16                                        | IC        | 136654                  | GALNT14               |
| cg25003924        | 5.55E-07        | 0.01218191                          | -0.10                                        | HC        | -390                    | ARPP19                |
| cg26176348        | 5.10E-07        | 0.01218191                          | -0.15                                        | LC        | 25539                   | ASAP2                 |
| cg00490349        | 8.06E-07        | 0.01555485                          | -0.22                                        | LC        | -62                     | DQ593189              |
| cg10020121        | 8.28E-07        | 0.01555485                          | -0.15                                        | IC        | 28912                   | KIAA1751              |
| cg12438037        | 9.11E-07        | 0.01584402                          | 0.14                                         | IC        | 1088                    | MRPS2                 |
| <b>cg17479830</b> | <b>9.20E-07</b> | <b>0.01584402</b>                   | <b>-0.17</b>                                 | <b>IC</b> | <b>-8577</b>            | <b>GALNT9</b>         |
| cg06149357        | 9.88E-07        | 0.01633154                          | -0.20                                        | ICshore   | -715                    | SRD5A2                |
| cg04978471        | 1.16E-06        | 0.01826386                          | 0.16                                         | LC        | 3248                    | TJAP1                 |
| cg08603125        | 1.28E-06        | 0.01826386                          | -0.12                                        | LC        | -1240                   | SRPK1                 |
| cg12618699        | 1.19E-06        | 0.01826386                          | -0.09                                        | IC        | 3281                    | LOC100507055          |
| cg19102771        | 1.25E-06        | 0.01826386                          | 0.11                                         | IC        | -1712                   | CCDC140               |
| cg10283371        | 1.42E-06        | 0.01831002                          | 0.15                                         | HC        | 18242                   | GADD45B               |
| cg14698665        | 1.33E-06        | 0.01831002                          | 0.09                                         | LC        | -3949                   | CTNND2                |
| cg20424400        | 1.40E-06        | 0.01831002                          | -0.16                                        | IC        | 14115                   | MVK                   |

|                   |                 |                   |              |           |               |                  |
|-------------------|-----------------|-------------------|--------------|-----------|---------------|------------------|
| cg15964153        | 1.56E-06        | 0.01945317        | -0.12        | HC        | 16378         | MIR4440          |
| cg22920594        | 1.60E-06        | 0.01945317        | -0.10        | LC        | 1719          | Metazoa_SRP      |
| <b>cg16763089</b> | <b>1.84E-06</b> | <b>0.02117508</b> | <b>0.22</b>  | <b>IC</b> | <b>-42</b>    | <b>LOC149837</b> |
| cg27060386        | 1.82E-06        | 0.02117508        | -0.12        | ICshore   | -12050        | AK128777         |
| cg11919837        | 2.08E-06        | 0.02203341        | -0.24        | IC        | -7630         | AX747062         |
| cg17413120        | 2.06E-06        | 0.02203341        | 0.22         | IC        | 17861         | MMP17            |
| cg21725652        | 2.05E-06        | 0.02203341        | -0.13        | LC        | -25340        | MIR598           |
| cg03486485        | 2.23E-06        | 0.02246341        | 0.13         | HC        | -13253        | CYP2R1           |
| <b>cg10553748</b> | <b>2.18E-06</b> | <b>0.02246341</b> | <b>-0.17</b> | <b>HC</b> | <b>1695</b>   | <b>CHRNE</b>     |
| cg04776470        | 2.44E-06        | 0.02399467        | -0.24        | IC        | 3157          | SYNJ2            |
| cg05812599        | 2.82E-06        | 0.02709994        | -0.15        | ICshore   | -572          | CLPB             |
| cg26071680        | 2.96E-06        | 0.02777592        | 0.12         | HC        | 321           | SAV1             |
| cg03800065        | 3.12E-06        | 0.02854731        | 0.19         | ICshore   | 29122         | AK125849         |
| cg12436631        | 3.18E-06        | 0.02854731        | -0.15        | LC        | 733           | DCST1            |
| cg10778379        | 3.38E-06        | 0.02971667        | -0.12        | IC        | 113           | WHSC1            |
| <b>cg03287299</b> | <b>3.48E-06</b> | <b>0.02993257</b> | <b>0.22</b>  | <b>IC</b> | <b>-3</b>     | <b>LOC149837</b> |
| cg27096232        | 3.69E-06        | 0.031141          | 0.24         | IC        | -6977         | RGS12            |
| cg06699669        | 3.84E-06        | 0.0315389         | -0.16        | HC        | -8953         | BC127192         |
| cg21005438        | 3.89E-06        | 0.0315389         | -0.09        | IC        | -32585        | FHAD1            |
| <b>cg01074305</b> | <b>4.26E-06</b> | <b>0.03199631</b> | <b>-0.15</b> | <b>IC</b> | <b>-19845</b> | <b>GALNT9</b>    |
| cg06315909        | 4.22E-06        | 0.03199631        | -0.10        | ICshore   | 118           | TMEM235          |
| cg12468478        | 4.18E-06        | 0.03199631        | 0.09         | ICshore   | 15            | TCF21            |
| cg21541083        | 4.09E-06        | 0.03199631        | -0.13        | ICshore   | -778          | STXBP2           |
| cg03975922        | 4.36E-06        | 0.03221632        | 0.11         | IC        | 544           | ZMAT2            |
| <b>cg25958766</b> | <b>4.55E-06</b> | <b>0.03298332</b> | <b>0.24</b>  | <b>IC</b> | <b>-26</b>    | <b>LOC149837</b> |
| cg00524676        | 5.26E-06        | 0.03744659        | 0.23         | IC        | 362035        | ALG10            |
| <b>cg09495303</b> | <b>5.62E-06</b> | <b>0.03744659</b> | <b>-0.15</b> | <b>HC</b> | <b>1531</b>   | <b>CHRNE</b>     |
| cg16964102        | 5.47E-06        | 0.03744659        | -0.08        | IC        | -7111         | SPRNP1           |
| cg21467717        | 5.57E-06        | 0.03744659        | -0.11        | HC        | -258          | KCNG2            |
| cg27117491        | 5.51E-06        | 0.03744659        | -0.09        | HC        | 742           | LOC375196        |
| cg25350176        | 5.83E-06        | 0.03823275        | -0.20        | IC        | -464883       | SALL3            |
| cg02799466        | 6.43E-06        | 0.04099832        | -0.16        | HC        | -354          | PID1             |
| cg22694087        | 6.45E-06        | 0.04099832        | -0.15        | ICshore   | 19096         | C3orf27          |
| cg10298859        | 6.62E-06        | 0.04147772        | -0.09        | IC        | 121630        | AK055145         |
| cg01556799        | 6.81E-06        | 0.04183835        | 0.21         | LC        | 311455        | EPHA6            |
| cg02484307        | 7.21E-06        | 0.04183835        | -0.10        | IC        | -49688        | JAZF1            |
| cg07741910        | 6.92E-06        | 0.04183835        | -0.14        | LC        | 442           | ZBTB22           |
| cg14901751        | 7.25E-06        | 0.04183835        | -0.13        | IC        | 245370        | CYP26B1          |
| cg26068527        | 7.07E-06        | 0.04183835        | -0.14        | IC        | -538          | MIR338           |
| <b>cg27009475</b> | <b>7.29E-06</b> | <b>0.04183835</b> | <b>-0.13</b> | <b>LC</b> | <b>-39536</b> | <b>EDAR</b>      |
| cg26058971        | 7.39E-06        | 0.04184177        | -0.19        | LC        | 50637         | SPEN             |
| cg14133850        | 7.88E-06        | 0.04404045        | -0.09        | IC        | 1925          | MPP7             |
| cg23843407        | 7.99E-06        | 0.0440447         | -0.12        | LC        | -19775        | FJX1             |
| cg01072786        | 8.21E-06        | 0.04465259        | -0.22        | HC        | 506           | GLB1L            |

|                   |                 |                   |              |           |              |                  |
|-------------------|-----------------|-------------------|--------------|-----------|--------------|------------------|
| <b>cg00492108</b> | <b>9.41E-06</b> | <b>0.045386</b>   | <b>-0.20</b> | <b>IC</b> | <b>54634</b> | <b>EDAR</b>      |
| cg02403929        | 9.53E-06        | 0.045386          | -0.09        | IC        | 7071         | RPTOR            |
| cg10373147        | 9.28E-06        | 0.045386          | 0.17         | LC        | -156525      | FSCB             |
| cg11797145        | 8.73E-06        | 0.045386          | 0.10         | ICshore   | -315         | MECR             |
| cg15676528        | 8.76E-06        | 0.045386          | -0.09        | IC        | -94292       | YWHAQ            |
| cg17703048        | 9.49E-06        | 0.045386          | -0.14        | IC        | -26113       | IGSF9B           |
| cg20582976        | 9.55E-06        | 0.045386          | -0.18        | LC        | 1447         | BX247991         |
| cg22188918        | 8.82E-06        | 0.045386          | -0.11        | LC        | -74          | CLDN15           |
| cg24696715        | 9.40E-06        | 0.045386          | -0.13        | IC        | 1411         | TGFB3            |
| cg26580609        | 8.68E-06        | 0.045386          | -0.06        | HC        | 104          | NT5C1B           |
| cg26851984        | 9.01E-06        | 0.045386          | -0.20        | LC        | 48740        | C5orf48          |
| cg07231053        | 1.05E-05        | 0.04587275        | -0.14        | IC        | 1787         | GALNT2           |
| cg13948456        | 1.02E-05        | 0.04587275        | 0.18         | IC        | -7655        | GPSM1            |
| cg17526483        | 1.04E-05        | 0.04587275        | -0.24        | IC        | -759         | EVX1             |
| cg18804963        | 1.05E-05        | 0.04587275        | 0.20         | LC        | 60371        | U6               |
| cg19769715        | 1.04E-05        | 0.04587275        | -0.15        | LC        | -155         | CAMK2A           |
| cg21782315        | 1.04E-05        | 0.04587275        | -0.12        | IC        | 39810        | LOC154449        |
| cg23259586        | 1.05E-05        | 0.04587275        | -0.19        | IC        | 23586        | AX748388         |
| cg25745861        | 1.00E-05        | 0.04587275        | -0.09        | LC        | -2782        | TMEM54           |
| cg13344344        | 1.08E-05        | 0.04659947        | 0.15         | HC        | 7544         | MAST1            |
| cg09743654        | 1.12E-05        | 0.04676646        | -0.14        | HC        | 15047        | PCBP1            |
| cg14645926        | 1.12E-05        | 0.04676646        | -0.09        | LC        | 3415         | FZD6             |
| cg15611809        | 1.12E-05        | 0.04676646        | -0.22        | IC        | -27750       | PIK3R1           |
| cg18635791        | 1.13E-05        | 0.04676646        | 0.16         | LC        | 22479        | IL5RA            |
| cg05341384        | 1.19E-05        | 0.04715432        | 0.09         | IC        | 11625        | LOC146513        |
| <b>cg10831901</b> | <b>1.20E-05</b> | <b>0.04715432</b> | <b>0.18</b>  | <b>IC</b> | <b>-52</b>   | <b>LOC149837</b> |
| cg10872844        | 1.19E-05        | 0.04715432        | 0.12         | LC        | -1404219     | Mir_548          |
| cg17657459        | 1.16E-05        | 0.04715432        | 0.23         | LC        | 21069        | 7SK              |
| cg19774236        | 1.18E-05        | 0.04715432        | -0.16        | IC        | 13035        | GUCY2D           |
| cg08438071        | 1.23E-05        | 0.04778108        | -0.09        | LC        | 9863         | PANK1            |
| cg21570020        | 1.24E-05        | 0.04778108        | -0.08        | IC        | 6089         | NEU4             |
| cg18638120        | 1.26E-05        | 0.04793095        | -0.09        | LC        | 2524         | MRPS18A          |
| cg25228422        | 1.26E-05        | 0.04793095        | -0.29        | HC        | 4609         | TWIST1           |
| cg02258414        | 1.28E-05        | 0.04814956        | -0.16        | IC        | -18262       | DEGS2            |
| cg16459281        | 1.31E-05        | 0.04870058        | -0.13        | IC        | -125226      | RYBP             |

TSS= transcription start site, HC= high-density CpG islands (CG content >55%, Obs/Exp CpG ratio >0.75 and length >500 bps), IC = intermediate-density CpG islands (CG content >50%, Obs/Exp CpG ratio >0.48 and length >200 bps), LC= low-density CpG regions (non-islands), ICShore= regions of intermediate-density CpG island that border HCs.

**S2 Table. Summary of the 849 DNA regions differentially methylated between bronchial brush isolated airway epithelial cells isolated from donors with and without asthma.**

| Chromosome Location | Start Location | End Location | Region Width | Number of CpGs | Minimum FDR | Max. difference in $\beta$ value | Mean difference in $\beta$ value | Overlapping Promoters |
|---------------------|----------------|--------------|--------------|----------------|-------------|----------------------------------|----------------------------------|-----------------------|
| chr17               | 1083309        | 1083958      | 650          | 4              | 0.00194     | 0.151                            | 0.005                            | ABR                   |
| chr2                | 162101123      | 162101506    | 384          | 3              | 1.12E-05    | -0.469                           | -0.303                           | AC009299.3            |
| chr2                | 220222765      | 220223201    | 437          | 4              | 0.00241     | 0.293                            | 0.145                            | AC053503.2            |
| chr2                | 233284112      | 233284934    | 823          | 4              | 0.00012     | -0.288                           | -0.197                           | AC068134.5            |
| chr15               | 96904912       | 96906732     | 1821         | 8              | 4.15E-08    | 0.439                            | 0.252                            | AC087477.1            |
| chr2                | 43327937       | 43328657     | 721          | 7              | 1.70E-07    | 0.399                            | 0.236                            | AC093609.1            |
| chr17               | 7982510        | 7982898      | 389          | 6              | 0.00316     | 0.118                            | 0.005                            | ALOX12B               |
| chr7                | 537126         | 537828       | 703          | 6              | 0.0001      | 0.359                            | 0.009                            | AC147651.1            |
| chr12               | 81471311       | 81472177     | 867          | 12             | 0.00029     | -0.140                           | 0.028                            | ACSS3                 |
| chr16               | 77468850       | 77469998     | 1149         | 8              | 0.0001      | -0.400                           | -0.112                           | ADAMTS18              |
| chr16               | 4102293        | 4103161      | 869          | 3              | 0.00142     | 0.267                            | 0.205                            | ADCY9                 |
| chr2                | 100722408      | 100723417    | 1010         | 6              | 0.00133     | 0.260                            | 0.153                            | AFF3                  |
| chr6                | 32151394       | 32151723     | 330          | 4              | 0.00393     | 0.180                            | 0.086                            | AGER                  |
| chr8                | 141565971      | 141566221    | 251          | 3              | 0.00015     | 0.248                            | 0.193                            | AGO2                  |
| chr2                | 241807747      | 241807924    | 178          | 3              | 0.00168     | 0.190                            | 0.072                            | AGXT                  |
| chr6                | 31584215       | 31584223     | 9            | 2              | 0.0038      | 0.174                            | 0.080                            | AIF1                  |
| chr17               | 29672336       | 29672644     | 309          | 2              | 2.46E-05    | 0.119                            | 0.065                            | AK4P1                 |
| chr14               | 104178670      | 104179660    | 991          | 5              | 0.00022     | 0.314                            | 0.151                            | AL049840.1            |
| chr6                | 30580928       | 30582352     | 1425         | 4              | 7.02E-08    | -0.248                           | -0.101                           | AL662800.1            |
| chr19               | 6373131        | 6373461      | 331          | 3              | 0.00106     | 0.018                            | 0.017                            | ALKBH7                |
| chr2                | 190539199      | 190539778    | 580          | 4              | 0.00236     | 0.127                            | 0.084                            | ANKAR                 |
| chr17               | 27920638       | 27920934     | 297          | 3              | 0.00084     | -0.044                           | -0.021                           | ANKRD13B              |
| chr15               | 69111367       | 69111511     | 145          | 3              | 0.00157     | 0.053                            | 0.028                            | ANP32A                |
| chr21               | 43161103       | 43161312     | 210          | 2              | 0.0005      | 0.226                            | 0.112                            | AP001615.9            |

|       |           |           |      |    |          |        |        |            |
|-------|-----------|-----------|------|----|----------|--------|--------|------------|
| chr2  | 21266500  | 21267113  | 614  | 9  | 0.00194  | 0.364  | 0.124  | APOB-001   |
| chr11 | 116700447 | 116700556 | 110  | 3  | 0.00394  | 0.207  | 0.142  | APOC3      |
| chr4  | 86850721  | 86851425  | 705  | 5  | 5.88E-07 | 0.453  | 0.350  | ARHGAP24   |
| chr1  | 17951184  | 17951330  | 147  | 2  | 0.00203  | 0.190  | 0.177  | ARHGEF10L  |
| chr15 | 52861754  | 52861919  | 166  | 2  | 0.00262  | 0.227  | 0.138  | ARPP19     |
| chr14 | 94423801  | 94425114  | 1314 | 6  | 0.00104  | 0.158  | 0.052  | ASB2       |
| chr11 | 2292361   | 2292544   | 184  | 9  | 0.0036   | -0.066 | -0.001 | ASCL2      |
| chr13 | 113439513 | 113439949 | 437  | 3  | 0.00136  | 0.046  | 0.022  | ATP11A     |
| chr6  | 31512618  | 31513867  | 1250 | 10 | 1.38E-05 | 0.262  | 0.128  | ATP6V1G2   |
| chr17 | 42275334  | 42275458  | 125  | 2  | 0.0024   | -0.189 | -0.110 | ATXN7L3    |
| chr16 | 403022    | 403800    | 779  | 3  | 1.92E-07 | 0.136  | 0.057  | AXIN1      |
| chr11 | 134254573 | 134255295 | 723  | 8  | 0.00015  | 0.176  | 0.080  | B3GAT1     |
| chr6  | 91006321  | 91006647  | 327  | 7  | 0.00339  | 0.011  | 0.007  | BACH2      |
| chr8  | 143545940 | 143545949 | 10   | 2  | 0.0023   | -0.412 | -0.365 | BAI1       |
| chr17 | 79030539  | 79030796  | 258  | 2  | 0.00016  | -0.380 | -0.214 | BAIAP2     |
| chr17 | 79005386  | 79005662  | 277  | 3  | 0.00158  | 0.183  | 0.040  | BAIAP2-AS1 |
| chr11 | 129246394 | 129246718 | 325  | 2  | 1.55E-05 | 0.355  | 0.187  | BARX2      |
| chr11 | 129306366 | 129306881 | 516  | 4  | 0.00112  | 0.310  | 0.241  | BARX2      |
| chr2  | 111876752 | 111877177 | 426  | 3  | 0.00219  | 0.325  | 0.223  | BCL2L11    |
| chr1  | 39956653  | 39956807  | 155  | 3  | 0.00372  | 0.108  | 0.054  | BMP8A      |
| chr11 | 8955878   | 8955884   | 7    | 2  | 0.00065  | 0.180  | 0.093  | C11orf16   |
| chr11 | 64728445  | 64728559  | 115  | 2  | 0.00152  | 0.413  | 0.320  | C11orf85   |
| chr1  | 228401186 | 228402305 | 1120 | 6  | 0.00046  | -0.199 | -0.039 | C1orf145   |
| chr1  | 112016586 | 112016615 | 30   | 2  | 2.28E-05 | 0.677  | 0.658  | C1orf162   |
| chr21 | 40985387  | 40985406  | 20   | 2  | 0.00049  | 0.247  | 0.212  | C21orf88   |
| chr15 | 62358531  | 62358982  | 452  | 4  | 0.00251  | 0.061  | 0.017  | C2CD4A     |
| chr6  | 31963526  | 31964754  | 1229 | 7  | 9.43E-07 | 0.185  | 0.105  | C4A-008    |
| chr18 | 20714332  | 20715409  | 1078 | 7  | 0.00042  | 0.054  | 0.025  | CABLES1    |
| chr18 | 20735537  | 20735672  | 136  | 3  | 0.0037   | 0.366  | 0.292  | CABLES1    |
| chr3  | 50540137  | 50540261  | 125  | 3  | 0.00257  | -0.166 | -0.085 | CACNA2D2   |

|       |           |           |      |    |          |        |        |                         |
|-------|-----------|-----------|------|----|----------|--------|--------|-------------------------|
| chr17 | 37353248  | 37353483  | 236  | 2  | 0.00175  | 0.031  | 0.021  | CACNB1                  |
| chr10 | 18629497  | 18629677  | 181  | 5  | 0.00171  | 0.369  | 0.210  | CACNB2                  |
| chr2  | 152954650 | 152954970 | 321  | 2  | 0.00218  | 0.013  | 0.004  | CACNB4                  |
| chr11 | 14926738  | 14927004  | 267  | 3  | 0.00036  | -0.274 | -0.087 | CALCB                   |
| chr7  | 71801793  | 71802574  | 782  | 3  | 0.00017  | 0.055  | 0.018  | CALN1                   |
| chr17 | 76993272  | 76993698  | 427  | 6  | 2.40E-12 | 0.396  | 0.198  | CANT1                   |
| chr2  | 241535685 | 241536284 | 600  | 5  | 3.00E-14 | 0.424  | 0.223  | CAPN10                  |
| chr11 | 67188491  | 67188871  | 381  | 5  | 0.00184  | 0.014  | 0.012  | CARNS1                  |
| chr17 | 73506017  | 73506230  | 214  | 6  | 0.00298  | -0.275 | -0.153 | CASKIN2                 |
| chr16 | 3193279   | 3193410   | 132  | 2  | 8.61E-05 | 0.175  | 0.114  | CASP16                  |
| chr19 | 45281236  | 45281526  | 291  | 4  | 0.00131  | 0.106  | 0.036  | CBLC                    |
| chr16 | 49314038  | 49314323  | 286  | 3  | 0.00118  | -0.323 | -0.134 | CBLN1                   |
| chr16 | 3085867   | 3086396   | 530  | 4  | 0.00133  | 0.173  | 0.074  | CCDC64B                 |
| chr11 | 64115989  | 64116279  | 291  | 4  | 0.00298  | -0.238 | -0.183 | CCDC88B                 |
| chr9  | 36169175  | 36169203  | 29   | 2  | 0.00157  | 0.170  | 0.111  | CCIN                    |
| chr11 | 69460951  | 69461451  | 501  | 5  | 0.00016  | 0.153  | 0.103  | CCND1                   |
| chr11 | 831170    | 831375    | 206  | 2  | 3.47E-07 | 0.167  | 0.090  | CD151                   |
| chr5  | 66492464  | 66492721  | 258  | 2  | 4.23E-06 | 0.250  | 0.217  | CD180                   |
| chr11 | 60869601  | 60869634  | 34   | 2  | 0.00323  | 0.175  | 0.026  | CD5                     |
| chr5  | 27039965  | 27040099  | 135  | 2  | 0.00022  | 0.179  | 0.142  | CDH9                    |
| chr11 | 2906934   | 2908036   | 1103 | 24 | 4.08E-05 | 0.222  | 0.035  | CDKN1C                  |
| chr4  | 184365405 | 184365897 | 493  | 6  | 0.0023   | -0.030 | 0.003  | CDKN2AIP                |
| chr1  | 22327803  | 22328026  | 224  | 2  | 0.0003   | 0.078  | 0.009  | CELA3A                  |
| chr4  | 56813860  | 56813898  | 39   | 2  | 0.00095  | 0.320  | 0.289  | CEP135                  |
| chr19 | 8273505   | 8274103   | 599  | 12 | 0.00053  | -0.225 | -0.029 | CERS4                   |
| chr17 | 48545805  | 48546321  | 517  | 8  | 0.00046  | -0.260 | -0.083 | CHAD                    |
| chr19 | 16630059  | 16630285  | 227  | 4  | 0.00382  | 0.174  | 0.105  | CHERP-008,<br>CHERP-007 |
| chr11 | 882636    | 882687    | 52   | 3  | 7.11E-05 | 0.452  | 0.296  | CHID1                   |
| chr8  | 42623686  | 42623946  | 261  | 6  | 0.00112  | 0.332  | 0.152  | CHRNA6                  |

|       |           |           |      |    |          |        |        |               |
|-------|-----------|-----------|------|----|----------|--------|--------|---------------|
| chr19 | 1265302   | 1265458   | 157  | 2  | 0.002    | 0.032  | 0.003  | CIRBP         |
| chr3  | 170137871 | 170138205 | 335  | 2  | 0.00278  | 0.328  | 0.310  | CLDN11        |
| chr21 | 31587610  | 31588354  | 745  | 3  | 0.00072  | 0.596  | 0.245  | CLDN8         |
| chr1  | 155239301 | 155239493 | 193  | 4  | 0.00282  | 0.178  | 0.072  | CLK2          |
| chr11 | 123066529 | 123067275 | 747  | 6  | 9.33E-06 | -0.401 | -0.205 | CLMP          |
| chr13 | 77565875  | 77566922  | 1048 | 8  | 1.75E-05 | 0.024  | 0.010  | CLN5          |
| chr6  | 75911716  | 75912711  | 996  | 7  | 6.71E-15 | 0.384  | 0.288  | COL12A1       |
| chr17 | 48268233  | 48268237  | 5    | 2  | 0.00169  | 0.162  | 0.147  | COL1A1        |
| chr7  | 130353742 | 130354073 | 332  | 9  | 0.003    | -0.208 | -0.060 | COPG2         |
| chr7  | 129931729 | 129932033 | 305  | 3  | 1.83E-06 | 0.109  | 0.049  | CPA4          |
| chr16 | 89650950  | 89650991  | 42   | 2  | 0.00446  | 0.295  | 0.195  | CPNE7         |
| chr21 | 44588747  | 44589331  | 585  | 10 | 0.00038  | 0.163  | 0.070  | CRYAA         |
| chr20 | 54968604  | 54968626  | 23   | 2  | 0.00059  | -0.302 | -0.259 | CSTF1         |
| chr10 | 126848743 | 126849062 | 320  | 2  | 0.00052  | -0.081 | -0.039 | CTBP2         |
| chr5  | 1849983   | 1850261   | 279  | 2  | 0.00279  | 0.509  | 0.381  | CTD-2194D22.1 |
| chr5  | 43019660  | 43020451  | 792  | 6  | 0.00072  | 0.277  | 0.128  | CTD-2201E18.3 |
| chr17 | 77963988  | 77964703  | 716  | 4  | 0.00301  | 0.145  | 0.030  | CTD-2529O21.1 |
| chr16 | 89118603  | 89119709  | 1107 | 8  | 3.05E-06 | 0.490  | 0.355  | CTD-2555A7.2  |
| chr17 | 78915878  | 78915881  | 4    | 2  | 0.00325  | 0.202  | 0.113  | CTD-2561B21.4 |
| chr8  | 28925837  | 28926051  | 215  | 3  | 0.00063  | 0.164  | 0.085  | CTD-2647L4.5  |
| chr16 | 54972078  | 54973385  | 1308 | 9  | 6.37E-06 | 0.375  | 0.250  | CTD-3032H12.1 |
| chr15 | 22954791  | 22956051  | 1261 | 10 | 1.28E-05 | 0.325  | 0.072  | CYFIP1        |
| chr17 | 74533845  | 74534419  | 575  | 7  | 0.0013   | 0.041  | 0.018  | CYGB-001      |
| chr2  | 72371255  | 72371552  | 298  | 4  | 0.00099  | 0.522  | 0.317  | CYP26B1       |
| chr22 | 42538836  | 42538988  | 153  | 3  | 0.00091  | 0.183  | 0.153  | CYP2D7P       |
| chr22 | 42548783  | 42549153  | 371  | 4  | 0.00207  | 0.281  | 0.133  | CYP2D8P       |
| chr3  | 82857026  | 82857285  | 260  | 4  | 0.00077  | 0.166  | 0.090  | CYP51A1P1     |



|       |           |           |      |    |          |        |        |           |
|-------|-----------|-----------|------|----|----------|--------|--------|-----------|
| chr11 | 61106595  | 61106785  | 191  | 4  | 0.00408  | 0.083  | 0.053  | DAK       |
| chr1  | 155006911 | 155007323 | 413  | 4  | 7.24E-05 | 0.347  | 0.131  | DCST2     |
| chr17 | 76899257  | 76899627  | 371  | 4  | 4.75E-06 | 0.201  | 0.056  | DDC8      |
| chr12 | 57915555  | 57915636  | 82   | 4  | 0.00257  | 0.217  | 0.056  | DDIT3     |
| chr6  | 30851069  | 30851529  | 461  | 5  | 0.00314  | 0.039  | 0.010  | DDR1      |
| chr12 | 124086193 | 124087057 | 865  | 13 | 0.00021  | -0.026 | 0.003  | DDX55     |
| chr11 | 46382544  | 46383209  | 666  | 6  | 4.01E-05 | -0.240 | -0.097 | DGKZ      |
| chr21 | 47878552  | 47878746  | 195  | 3  | 0.00372  | 0.010  | 0.005  | DIP2A     |
| chr20 | 34995278  | 34995517  | 240  | 4  | 0.00236  | 0.194  | 0.101  | DLGAP4    |
| chr2  | 172949481 | 172949501 | 21   | 2  | 0.00359  | 0.067  | 0.044  | DLX1      |
| chr7  | 96652894  | 96653617  | 724  | 3  | 0.00062  | 0.142  | 0.123  | DLX5      |
| chr5  | 174872330 | 174872371 | 42   | 2  | 0.00103  | -0.369 | -0.289 | DRD1      |
| chr2  | 96810531  | 96811264  | 734  | 5  | 0.00014  | 0.032  | 0.008  | DUSP2     |
| chr10 | 82116203  | 82117119  | 917  | 11 | 0.00171  | 0.222  | 0.022  | DYDC2     |
| chr14 | 102510281 | 102510790 | 510  | 6  | 1.20E-05 | 0.243  | 0.044  | DYNC1H1   |
| chr20 | 57875318  | 57875545  | 228  | 7  | 0.00433  | 0.103  | 0.006  | EDN3      |
| chr12 | 107296891 | 107297296 | 406  | 5  | 0.00202  | 0.251  | 0.099  | EEF1B2P4  |
| chr1  | 35586358  | 35586649  | 292  | 5  | 0.00118  | -0.299 | -0.223 | EFCAB14P1 |
| chr14 | 23834860  | 23835595  | 736  | 8  | 0.00114  | 0.036  | 0.003  | EFS       |
| chr6  | 32135070  | 32135396  | 327  | 13 | 0.00331  | 0.261  | 0.071  | EGFL8     |
| chr8  | 22548546  | 22548952  | 407  | 3  | 0.00089  | -0.271 | -0.193 | EGR3      |
| chr6  | 31854757  | 31856329  | 1573 | 26 | 2.39E-06 | -0.135 | 0.026  | EHMT2     |
| chr17 | 7475727   | 7476167   | 441  | 11 | 0.00211  | 0.044  | -0.005 | EIF4A1    |
| chr1  | 79471984  | 79472917  | 934  | 11 | 1.36E-07 | 0.354  | 0.175  | ELTD1     |
| chr3  | 125567161 | 125567258 | 98   | 3  | 0.00155  | 0.146  | 0.065  | ENPP7P4   |
| chr6  | 152127812 | 152127887 | 76   | 3  | 0.00104  | 0.181  | 0.078  | ESR1      |
| chr17 | 74005445  | 74005651  | 207  | 2  | 0.00232  | 0.116  | 0.097  | EVPL      |
| chr7  | 27280585  | 27281964  | 1380 | 13 | 3.83E-08 | 0.373  | 0.212  | EVX1      |
| chr12 | 111799994 | 111801411 | 1418 | 8  | 0.00035  | 0.122  | 0.054  | FAM109A   |
| chr13 | 46189838  | 46190198  | 361  | 8  | 0.00188  | -0.163 | -0.031 | FAM194B   |

|       |           |           |      |    |          |        |        |           |
|-------|-----------|-----------|------|----|----------|--------|--------|-----------|
| chr21 | 46358532  | 46358702  | 171  | 2  | 0.00018  | 0.413  | 0.382  | FAM207A   |
| chr10 | 88779109  | 88779941  | 833  | 7  | 0.00011  | 0.128  | 0.089  | FAM25A    |
| chr6  | 3848218   | 3850106   | 1889 | 32 | 3.34E-25 | -0.254 | 0.136  | FAM50B    |
| chr19 | 55873515  | 55873983  | 469  | 4  | 0.00265  | 0.191  | 0.062  | FAM71E2   |
| chr12 | 133066061 | 133066762 | 702  | 17 | 0.0022   | 0.018  | 0.005  | FBRSL1    |
| chr1  | 11710460  | 11711141  | 682  | 3  | 7.47E-05 | 0.358  | 0.224  | FBXO2-004 |
| chr8  | 38323238  | 38323291  | 54   | 2  | 0.00063  | 0.366  | 0.305  | FGFR1     |
| chr10 | 123353298 | 123354171 | 874  | 13 | 3.63E-12 | 0.303  | 0.222  | FGFR2     |
| chr16 | 67282407  | 67282837  | 431  | 3  | 0.00322  | 0.011  | 0.010  | FHOD1     |
| chr12 | 2903563   | 2904419   | 857  | 10 | 0.00063  | 0.024  | 0.004  | FKBP4     |
| chr7  | 128471146 | 128471600 | 455  | 2  | 0.00276  | -0.161 | -0.154 | FLNC      |
| chr17 | 80673184  | 80673675  | 492  | 2  | 0.00015  | 0.232  | 0.180  | FN3KRP    |
| chr6  | 1607922   | 1608977   | 1056 | 8  | 6.93E-06 | 0.440  | 0.198  | FOXC1     |
| chr14 | 29236898  | 29237480  | 583  | 3  | 0.0013   | 0.162  | 0.118  | FOXG1     |
| chr10 | 14051636  | 14052028  | 393  | 6  | 0.00178  | 0.210  | 0.170  | FRMD4A    |
| chr2  | 181738051 | 181738271 | 221  | 3  | 0.00436  | 0.195  | 0.169  | FTH1P20   |
| chr19 | 35606534  | 35607221  | 688  | 6  | 0.00017  | 0.050  | 0.024  | FXYD3     |
| chr19 | 35633669  | 35633794  | 126  | 2  | 0.00448  | 0.014  | 0.012  | FXYD7     |
| chr5  | 39219245  | 39220149  | 905  | 4  | 0.00038  | 0.119  | 0.070  | FYB       |
| chr2  | 202901045 | 202901470 | 426  | 5  | 6.54E-07 | 0.459  | 0.345  | FZD7      |
| chr7  | 72847175  | 72848481  | 1307 | 6  | 9.61E-05 | -0.204 | -0.010 | FZD9      |
| chr15 | 27111884  | 27112430  | 547  | 11 | 0.00159  | -0.228 | -0.041 | GABRA5    |
| chr2  | 242716388 | 242716801 | 414  | 4  | 0.00169  | -0.280 | -0.199 | GAL3ST2   |
| chr3  | 16216094  | 16216215  | 122  | 4  | 0.00186  | 0.122  | 0.088  | GALNT15   |
| chr10 | 8095960   | 8098328   | 2369 | 30 | 1.22E-07 | -0.310 | 0.004  | GATA3     |
| chr10 | 8100114   | 8101566   | 1453 | 7  | 1.16E-08 | -0.367 | -0.179 | GATA3     |
| chr2  | 237075188 | 237075576 | 389  | 2  | 0.00025  | 0.040  | 0.033  | GBX2      |
| chr6  | 10529972  | 10530035  | 64   | 2  | 0.00034  | 0.436  | 0.435  | GCNT2     |
| chr20 | 25387977  | 25388289  | 313  | 6  | 0.00438  | -0.128 | -0.020 | GINS1     |
| chr1  | 35245692  | 35245996  | 305  | 3  | 9.64E-05 | 0.226  | 0.096  | GJB3      |

|       |           |           |      |    |          |        |        |          |
|-------|-----------|-----------|------|----|----------|--------|--------|----------|
| chr15 | 35046610  | 35046765  | 156  | 3  | 0.00042  | 0.239  | 0.144  | GJD2     |
| chr8  | 144358043 | 144358898 | 856  | 3  | 0.00024  | 0.167  | 0.143  | GLI4     |
| chr16 | 4364093   | 4364150   | 58   | 2  | 0.00399  | -0.158 | -0.019 | GLIS2    |
| chr6  | 1624386   | 1624720   | 335  | 3  | 8.75E-06 | 0.326  | 0.174  | GMDS     |
| chr20 | 57415144  | 57415697  | 554  | 4  | 0.00088  | 0.156  | 0.071  | GNAS     |
| chr16 | 850562    | 851298    | 737  | 7  | 0.00035  | 0.143  | 0.033  | GNG13    |
| chr1  | 235813839 | 235814462 | 624  | 11 | 0.00085  | 0.240  | 0.043  | GNG4     |
| chr3  | 128778738 | 128780164 | 1427 | 9  | 0.00011  | 0.208  | 0.067  | GP9      |
| chr1  | 27216367  | 27216933  | 567  | 8  | 0.00192  | -0.038 | -0.003 | GPN2     |
| chr6  | 46889624  | 46890512  | 889  | 5  | 1.83E-06 | -0.399 | -0.156 | GPR116   |
| chr6  | 32164801  | 32165200  | 400  | 4  | 0.0028   | 0.317  | 0.192  | GPSM3    |
| chr17 | 37895424  | 37896620  | 1197 | 7  | 6.09E-06 | 0.071  | 0.016  | GRB7     |
| chr6  | 101846967 | 101847706 | 740  | 8  | 7.08E-05 | 0.381  | 0.223  | GRIK2    |
| chr13 | 21893289  | 21893662  | 374  | 4  | 0.00063  | 0.169  | 0.066  | GRK6P1   |
| chr13 | 114018021 | 114018173 | 153  | 2  | 0.00159  | 0.019  | 0.008  | GRTP1    |
| chr14 | 95236123  | 95236615  | 493  | 5  | 0.0033   | -0.138 | -0.056 | GSC      |
| chr6  | 30878952  | 30879000  | 49   | 2  | 0.00403  | 0.144  | 0.076  | GTF2H4   |
| chr7  | 73867797  | 73868870  | 1074 | 11 | 0.00141  | -0.043 | -0.001 | GTF2IRD1 |
| chr11 | 2020417   | 2020560   | 144  | 4  | 0.00239  | 0.081  | 0.049  | H19      |
| chr1  | 226249809 | 226250443 | 635  | 9  | 0.00308  | -0.028 | 0.000  | H3F3A    |
| chr10 | 115312553 | 115312600 | 48   | 2  | 0.00044  | 0.260  | 0.167  | HABP2    |
| chr19 | 35772657  | 35772917  | 261  | 2  | 0.00255  | 0.310  | 0.121  | HAMP     |
| chr16 | 222837    | 223408    | 572  | 4  | 6.38E-05 | -0.125 | -0.045 | HBA2     |
| chr6  | 29974022  | 29975154  | 1133 | 32 | 9.57E-05 | 0.099  | 0.003  | HCG4P3   |
| chr2  | 239988369 | 239988451 | 83   | 2  | 0.00125  | 0.234  | 0.140  | HDAC4    |
| chr11 | 93754094  | 93754390  | 297  | 4  | 0.00077  | 0.108  | 0.072  | HEPHL1   |
| chr17 | 8028735   | 8028948   | 214  | 4  | 0.00264  | 0.052  | 0.015  | HES7     |
| chr4  | 3442962   | 3444147   | 1186 | 9  | 1.07E-05 | 0.205  | 0.084  | HGFAC    |
| chr17 | 79663964  | 79664552  | 589  | 4  | 2.59E-05 | 0.189  | 0.098  | HGS      |
| chr12 | 51346947  | 51347099  | 153  | 3  | 0.00235  | 0.180  | 0.140  | HIGD1C   |

|       |           |           |      |    |          |        |        |           |
|-------|-----------|-----------|------|----|----------|--------|--------|-----------|
| chr6  | 26225520  | 26226256  | 737  | 5  | 0.00041  | 0.342  | 0.144  | HIST1H3E  |
| chr6  | 26239995  | 26240579  | 585  | 6  | 4.78E-06 | 0.147  | 0.062  | HIST1H4F  |
| chr1  | 228644750 | 228645710 | 961  | 17 | 5.93E-09 | 0.275  | 0.053  | HIST3H2A  |
| chr1  | 228612603 | 228613260 | 658  | 10 | 0.00044  | 0.119  | 0.043  | HIST3H3   |
| chr1  | 42503579  | 42503768  | 190  | 2  | 0.00099  | 0.372  | 0.163  | HIVEP3    |
| chr6  | 32920567  | 32920880  | 314  | 5  | 0.00259  | 0.237  | 0.079  | HLA-DMA   |
| chr6  | 29855110  | 29856141  | 1032 | 13 | 0.00156  | 0.109  | 0.013  | HLA-H-201 |
| chr12 | 10264389  | 10265096  | 708  | 3  | 0.00045  | 0.191  | 0.055  | HNRNPABP1 |
| chr7  | 27180888  | 27181067  | 180  | 2  | 0.00158  | -0.342 | -0.110 | HOXA5     |
| chr12 | 54333179  | 54333224  | 46   | 2  | 0.00275  | -0.239 | -0.135 | HOXC13    |
| chr12 | 54446019  | 54446576  | 558  | 7  | 1.44E-05 | -0.341 | -0.198 | HOXC4     |
| chr2  | 129076914 | 129077232 | 319  | 2  | 0.00143  | 0.275  | 0.127  | HS6ST1    |
| chr14 | 65005951  | 65006359  | 409  | 9  | 1.14E-06 | 0.333  | 0.093  | HSPA2     |
| chr4  | 3231575   | 3231885   | 311  | 3  | 0.002    | 0.168  | 0.099  | HTT       |
| chr21 | 33247276  | 33248032  | 757  | 3  | 0.00071  | 0.639  | 0.309  | HUNK      |
| chr1  | 228362309 | 228362509 | 201  | 3  | 0.00246  | 0.311  | 0.229  | IBA57     |
| chr1  | 6284844   | 6285107   | 264  | 3  | 0.00358  | 0.106  | 0.070  | ICMT      |
| chr10 | 1068490   | 1068567   | 78   | 3  | 0.00396  | -0.315 | -0.225 | IDI2-AS1  |
| chr6  | 30710200  | 30711644  | 1445 | 35 | 0.00112  | -0.042 | 0.001  | IER3      |
| chr1  | 19280186  | 19280546  | 361  | 2  | 2.04E-06 | 0.391  | 0.200  | IFFO2     |
| chr17 | 47074576  | 47075880  | 1305 | 11 | 0.00024  | 0.271  | 0.051  | IGF2BP1   |
| chr16 | 1842068   | 1842505   | 438  | 3  | 0.00398  | 0.182  | 0.035  | IGFALS    |
| chr1  | 159916077 | 159916472 | 396  | 2  | 0.00026  | 0.266  | 0.142  | IGSF9     |
| chr19 | 18197544  | 18197853  | 310  | 4  | 0.00212  | -0.337 | -0.189 | IL12RB1   |
| chr20 | 20347495  | 20347593  | 99   | 2  | 3.35E-06 | 0.292  | 0.133  | INSM1     |
| chr5  | 39721549  | 39721760  | 212  | 4  | 0.0033   | -0.104 | 0.018  | INTS6P1   |
| chr6  | 154677796 | 154678326 | 531  | 3  | 1.88E-05 | 0.177  | 0.035  | IPCEF1    |
| chr5  | 75701065  | 75701460  | 396  | 2  | 0.00058  | 0.191  | 0.160  | IQGAP2    |
| chr1  | 234746099 | 234746800 | 702  | 8  | 0.00156  | -0.017 | -0.002 | IRF2BP2   |
| chr11 | 616879    | 617708    | 830  | 6  | 0.00011  | 0.136  | 0.042  | IRF7      |

|       |           |           |      |    |          |        |        |           |
|-------|-----------|-----------|------|----|----------|--------|--------|-----------|
| chr5  | 2753746   | 2756361   | 2616 | 18 | 8.86E-06 | 0.499  | 0.231  | IRX2      |
| chr1  | 949392    | 949893    | 502  | 5  | 4.87E-06 | 0.249  | 0.129  | ISG15     |
| chr15 | 76628154  | 76629110  | 957  | 8  | 1.23E-05 | 0.294  | 0.091  | ISL2      |
| chr15 | 74422545  | 74423449  | 905  | 11 | 9.89E-05 | -0.164 | -0.025 | ISLR2     |
| chr19 | 55965878  | 55966376  | 499  | 2  | 0.00115  | 0.214  | 0.163  | ISOC2     |
| chr21 | 46350872  | 46351329  | 458  | 3  | 0.00036  | -0.198 | -0.149 | ITGB2     |
| chr15 | 41794412  | 41794747  | 336  | 2  | 0.00037  | 0.227  | 0.189  | ITPKA     |
| chr11 | 133937475 | 133937493 | 19   | 2  | 0.00445  | 0.341  | 0.308  | JAM3      |
| chr22 | 39096679  | 39097540  | 862  | 5  | 4.57E-05 | -0.027 | 0.001  | JOSD1     |
| chr3  | 124103560 | 124103696 | 137  | 4  | 0.00048  | 0.481  | 0.462  | KALRN     |
| chr19 | 49575475  | 49575664  | 190  | 2  | 0.00363  | 0.152  | 0.103  | KCNA7     |
| chr3  | 155838109 | 155838625 | 517  | 4  | 2.00E-07 | 0.367  | 0.230  | KCNAB1    |
| chr11 | 2883529   | 2884145   | 617  | 7  | 0.00041  | 0.143  | 0.006  | KCNQ1-AS1 |
| chr6  | 73329988  | 73330358  | 371  | 5  | 9.44E-05 | 0.311  | 0.289  | KCNQ5     |
| chr8  | 99440279  | 99440522  | 244  | 3  | 0.00045  | 0.258  | 0.168  | KCNS2     |
| chr6  | 168416740 | 168417743 | 1004 | 7  | 3.03E-11 | 0.488  | 0.371  | KIF25     |
| chr15 | 90199883  | 90200115  | 233  | 2  | 2.02E-05 | 0.197  | 0.116  | KIF7      |
| chr15 | 31619949  | 31620290  | 342  | 2  | 0.00017  | 0.021  | 0.011  | KLF13     |
| chr10 | 3828932   | 3829456   | 525  | 2  | 0.00055  | 0.346  | 0.306  | KLF6      |
| chr22 | 50986031  | 50987294  | 1264 | 6  | 6.03E-05 | -0.374 | -0.255 | KLHDC7B   |
| chr1  | 161068138 | 161068715 | 578  | 4  | 0.00324  | -0.024 | -0.010 | KLHDC9    |
| chr19 | 51486901  | 51487136  | 236  | 3  | 0.00184  | 0.282  | 0.141  | KLK7      |
| chr17 | 39742965  | 39743427  | 463  | 3  | 0.00089  | 0.439  | 0.214  | KRT14     |
| chr12 | 52827847  | 52829316  | 1470 | 8  | 4.00E-07 | 0.213  | 0.143  | KRT75     |
| chr12 | 52586635  | 52586810  | 176  | 2  | 0.00313  | 0.221  | 0.156  | KRT80     |
| chr12 | 52714864  | 52715691  | 828  | 5  | 5.54E-06 | 0.315  | 0.115  | KRT83     |
| chr12 | 52760975  | 52762005  | 1031 | 7  | 0.00015  | 0.181  | 0.030  | KRT85     |
| chr21 | 46077454  | 46078007  | 554  | 6  | 0.00012  | 0.148  | 0.073  | KRTAP12   |
| chr11 | 1717919   | 1718586   | 668  | 3  | 3.70E-05 | 0.153  | 0.127  | KRTAP5-6  |

|       |           |           |      |    |          |        |        |                       |
|-------|-----------|-----------|------|----|----------|--------|--------|-----------------------|
| chr16 | 1682412   | 1682446   | 35   | 2  | 0.00012  | 0.336  | 0.225  | LA16c-431H6.6         |
| chr1  | 201368390 | 201369650 | 1261 | 11 | 1.10E-05 | -0.115 | -0.003 | LAD1-002,<br>LAD1-001 |
| chr12 | 6881118   | 6882083   | 966  | 9  | 3.47E-07 | -0.358 | -0.163 | LAG3                  |
| chr16 | 28995994  | 28996533  | 540  | 11 | 0.00055  | 0.220  | 0.105  | LAT                   |
| chr20 | 36974764  | 36975083  | 320  | 5  | 2.26E-05 | 0.163  | 0.062  | LBP                   |
| chr2  | 74731354  | 74731413  | 60   | 3  | 0.00092  | 0.310  | 0.200  | LBX2                  |
| chr9  | 98782756  | 98782979  | 224  | 2  | 0.00136  | 0.303  | 0.103  | LINC00092             |
| chr13 | 24040391  | 24040510  | 120  | 2  | 0.00175  | 0.061  | 0.008  | LINC00327             |
| chr5  | 87967728  | 87968528  | 801  | 5  | 3.02E-06 | 0.245  | 0.058  | LINC00461             |
| chr4  | 124694137 | 124694178 | 42   | 2  | 0.00018  | 0.241  | 0.234  | LINC01091             |
| chr2  | 71115787  | 71116411  | 625  | 4  | 0.00067  | 0.123  | 0.058  | LINC01143             |
| chr4  | 54457645  | 54458246  | 602  | 6  | 0.00051  | 0.155  | 0.057  | LNX1                  |
| chr17 | 66194137  | 66195485  | 1349 | 14 | 4.26E-09 | 0.317  | 0.121  | LOC440461             |
| chr19 | 14273676  | 14274172  | 497  | 4  | 7.87E-05 | 0.139  | 0.059  | LPHN1-004             |
| chr1  | 53794313  | 53795111  | 799  | 3  | 4.09E-07 | 0.238  | 0.166  | LRP8                  |
| chr6  | 31548843  | 31550090  | 1248 | 18 | 3.28E-05 | 0.205  | 0.033  | LTB                   |
| chr11 | 65306116  | 65306186  | 71   | 2  | 0.00063  | -0.185 | -0.085 | LTBP3                 |
| chr1  | 23496304  | 23496648  | 345  | 2  | 0.00035  | 0.260  | 0.233  | LUZP1                 |
| chr6  | 31650735  | 31651362  | 628  | 17 | 0.00018  | 0.222  | -0.048 | LY6G5C                |
| chr22 | 21335304  | 21335632  | 329  | 2  | 0.00064  | 0.221  | 0.132  | LZTR1                 |
| chr13 | 36049807  | 36051073  | 1267 | 10 | 0.00031  | 0.448  | 0.315  | MAB21L1               |
| chr1  | 11751781  | 11753338  | 1558 | 7  | 2.24E-07 | -0.319 | -0.038 | MAD2L2                |
| chr7  | 1570208   | 1570663   | 456  | 5  | 0.00039  | 0.032  | 0.016  | MAFK                  |
| chr5  | 71475111  | 71475356  | 246  | 3  | 1.88E-05 | 0.257  | 0.130  | MAP1B                 |
| chr11 | 65374955  | 65375203  | 249  | 4  | 0.00207  | 0.243  | 0.153  | MAP3K11               |
| chr21 | 30451398  | 30452272  | 875  | 3  | 1.78E-09 | 0.233  | 0.115  | MAP3K7CL              |
| chr14 | 71250264  | 71250424  | 161  | 3  | 0.00029  | 0.387  | 0.208  | MAP3K9                |
| chr11 | 45923319  | 45924191  | 873  | 2  | 0.00037  | 0.152  | 0.142  | MAPK8IP1              |
| chr2  | 27239543  | 27239739  | 197  | 2  | 0.00059  | 0.185  | 0.103  | MAPRE3                |

|       |           |           |      |    |          |        |        |                                       |
|-------|-----------|-----------|------|----|----------|--------|--------|---------------------------------------|
| chr17 | 43971177  | 43971471  | 295  | 3  | 0.00238  | -0.116 | -0.079 | MAPT                                  |
| chr13 | 113556413 | 113556486 | 74   | 2  | 0.00031  | 0.530  | 0.362  | MCF2L-015,<br>MCF2L-016,<br>MCF2L-205 |
| chr2  | 131010075 | 131010871 | 797  | 6  | 6.66E-05 | 0.401  | 0.224  | MED15P5                               |
| chr14 | 101291136 | 101292306 | 1171 | 19 | 0.00044  | 0.235  | 0.069  | MEG3                                  |
| chr7  | 130130918 | 130131268 | 351  | 7  | 0.00336  | 0.047  | 0.034  | MEST                                  |
| chr4  | 2935692   | 2936284   | 593  | 8  | 0.00042  | -0.030 | 0.004  | MFSD10                                |
| chr17 | 74733438  | 74733682  | 245  | 7  | 0.00439  | -0.045 | -0.002 | MFSD11                                |
| chr16 | 4714443   | 4714815   | 373  | 5  | 2.22E-05 | 0.316  | 0.146  | MGRN1                                 |
| chr22 | 18325160  | 18325505  | 346  | 2  | 0.00115  | 0.334  | 0.328  | MICAL3                                |
| chr6  | 31465865  | 31466187  | 323  | 10 | 0.00201  | -0.017 | 0.005  | MICB                                  |
| chr17 | 19247837  | 19248565  | 729  | 9  | 0.00016  | -0.371 | -0.181 | MIR1180                               |
| chr22 | 45596797  | 45597767  | 971  | 10 | 6.46E-06 | 0.299  | 0.181  | MIR1249                               |
| chr15 | 86315115  | 86315211  | 97   | 3  | 6.96E-06 | 0.390  | 0.309  | MIR1276                               |
| chr15 | 86313046  | 86313973  | 928  | 8  | 0.00012  | 0.294  | 0.180  | MIR1276                               |
| chr21 | 26934197  | 26934455  | 259  | 3  | 0.00181  | 0.103  | 0.046  | MIR155HG                              |
| chr20 | 57393844  | 57394097  | 254  | 3  | 0.00013  | 0.278  | 0.220  | MIR296                                |
| chr8  | 96085270  | 96085448  | 179  | 3  | 0.00364  | 0.341  | 0.251  | MIR3150A                              |
| chr16 | 67236231  | 67236337  | 107  | 2  | 0.00331  | 0.084  | 0.073  | MIR328                                |
| chr1  | 9212514   | 9212754   | 241  | 3  | 0.0004   | 0.164  | 0.116  | MIR34A                                |
| chr10 | 118925704 | 118925818 | 115  | 2  | 0.00194  | -0.103 | -0.043 | MIR3663                               |
| chr4  | 2251938   | 2252007   | 70   | 2  | 0.00386  | -0.208 | -0.185 | MIR4800                               |
| chr12 | 95226786  | 95226993  | 208  | 3  | 7.63E-07 | 0.349  | 0.224  | MIR492                                |
| chr9  | 125874627 | 125874949 | 323  | 2  | 0.00074  | -0.275 | -0.138 | MIR600HG                              |
| chr19 | 3962150   | 3962194   | 45   | 2  | 0.00309  | 0.255  | 0.178  | MIR637                                |
| chr17 | 56296444  | 56297515  | 1072 | 15 | 1.03E-13 | 0.503  | 0.129  | MKS1                                  |
| chr22 | 50523686  | 50524691  | 1006 | 13 | 3.15E-05 | 0.335  | 0.086  | MLC1                                  |
| chr8  | 144653570 | 144653975 | 406  | 5  | 0.00019  | 0.040  | 0.008  | MROH6                                 |
| chr9  | 138393270 | 138393570 | 301  | 2  | 1.07E-05 | -0.180 | -0.080 | MRPS2                                 |
| chr14 | 105932930 | 105933283 | 354  | 3  | 0.00029  | 0.194  | 0.059  | MTA1                                  |

|       |           |           |      |   |          |        |        |         |
|-------|-----------|-----------|------|---|----------|--------|--------|---------|
| chr17 | 48585216  | 48585270  | 55   | 2 | 0.00264  | -0.256 | -0.218 | MYCBPAP |
| chr6  | 1615236   | 1617619   | 2384 | 8 | 2.93E-16 | 0.720  | 0.493  | NA      |
| chr14 | 104979372 | 104980775 | 1404 | 6 | 2.24E-18 | 0.562  | 0.444  | NA      |
| chr11 | 115581830 | 115581955 | 126  | 3 | 3.24E-12 | 0.685  | 0.514  | NA      |
| chr3  | 140813919 | 140814133 | 215  | 3 | 1.34E-15 | 0.581  | 0.527  | NA      |
| chr8  | 1906338   | 1906498   | 161  | 3 | 1.28E-11 | 0.459  | 0.436  | NA      |
| chr6  | 101849938 | 101850881 | 944  | 3 | 5.38E-07 | 0.461  | 0.336  | NA      |
| chr6  | 164345272 | 164345307 | 36   | 2 | 2.29E-06 | 0.401  | 0.333  | NA      |
| chr20 | 58983676  | 58983939  | 264  | 2 | 3.17E-06 | 0.389  | 0.251  | NA      |
| chr5  | 72607540  | 72607795  | 256  | 2 | 1.62E-05 | 0.517  | 0.476  | NA      |
| chr20 | 20433168  | 20433328  | 161  | 3 | 2.22E-07 | 0.413  | 0.326  | NA      |
| chr19 | 872690    | 873330    | 641  | 2 | 4.43E-06 | -0.401 | -0.386 | NA      |
| chr8  | 102121398 | 102121621 | 224  | 2 | 1.01E-05 | 0.593  | 0.506  | NA      |
| chr12 | 5537882   | 5538415   | 534  | 2 | 0.00031  | -0.272 | -0.229 | NA      |
| chr12 | 117042854 | 117042917 | 64   | 3 | 5.20E-05 | 0.628  | 0.564  | NA      |
| chr8  | 67419572  | 67419936  | 365  | 2 | 0.00029  | 0.305  | 0.285  | NA      |
| chr19 | 33892576  | 33892662  | 87   | 2 | 0.00038  | 0.162  | 0.142  | NA      |
| chr5  | 3932145   | 3932233   | 89   | 2 | 0.00037  | 0.577  | 0.459  | NA      |
| chr2  | 128453108 | 128453484 | 377  | 5 | 2.04E-09 | 0.423  | 0.352  | NA      |
| chr8  | 143473852 | 143473903 | 52   | 2 | 0.00018  | 0.136  | 0.092  | NA      |
| chr6  | 138785358 | 138785451 | 94   | 2 | 0.00053  | 0.135  | 0.126  | NA      |
| chr5  | 1973774   | 1974131   | 358  | 3 | 4.56E-05 | 0.468  | 0.257  | NA      |
| chr19 | 13208349  | 13208599  | 251  | 2 | 0.00015  | -0.271 | -0.238 | NA      |
| chr7  | 90895894  | 90896701  | 808  | 4 | 1.27E-06 | 0.528  | 0.365  | NA      |
| chr7  | 156309329 | 156309358 | 30   | 2 | 0.00155  | 0.315  | 0.265  | NA      |
| chr17 | 840950    | 840975    | 26   | 2 | 0.00246  | 0.248  | 0.209  | NA      |
| chr19 | 42880974  | 42881132  | 159  | 2 | 0.0003   | 0.160  | 0.134  | NA      |
| chr4  | 11652441  | 11652505  | 65   | 3 | 1.07E-05 | 0.493  | 0.384  | NA      |
| chr8  | 1895431   | 1895558   | 128  | 2 | 0.00023  | 0.275  | 0.274  | NA      |
| chr10 | 521758    | 521830    | 73   | 3 | 0.00013  | 0.306  | 0.289  | NA      |



|       |           |           |     |   |          |        |        |    |
|-------|-----------|-----------|-----|---|----------|--------|--------|----|
| chr10 | 134221633 | 134221855 | 223 | 2 | 3.20E-05 | 0.042  | 0.040  | NA |
| chr6  | 99236007  | 99236061  | 55  | 2 | 0.00034  | 0.285  | 0.196  | NA |
| chr19 | 49061546  | 49061702  | 157 | 3 | 0.00012  | 0.426  | 0.357  | NA |
| chr16 | 86860774  | 86860801  | 28  | 2 | 0.00265  | 0.160  | 0.159  | NA |
| chr11 | 122848983 | 122849037 | 55  | 2 | 0.00119  | -0.253 | -0.221 | NA |
| chr9  | 98491087  | 98491311  | 225 | 2 | 0.00098  | 0.225  | 0.224  | NA |
| chr12 | 130921499 | 130921861 | 363 | 2 | 0.00241  | 0.142  | 0.137  | NA |
| chr7  | 632926    | 633202    | 277 | 3 | 3.09E-05 | 0.496  | 0.386  | NA |
| chr5  | 170877540 | 170878246 | 707 | 5 | 5.36E-07 | -0.478 | -0.387 | NA |
| chr15 | 45409170  | 45409319  | 150 | 2 | 0.00274  | 0.273  | 0.228  | NA |
| chr1  | 2188767   | 2188894   | 128 | 2 | 0.00127  | 0.367  | 0.311  | NA |
| chr14 | 102918905 | 102918977 | 73  | 2 | 0.00131  | 0.212  | 0.189  | NA |
| chr17 | 80943851  | 80944193  | 343 | 3 | 0.00025  | 0.301  | 0.232  | NA |
| chr1  | 37337827  | 37337877  | 51  | 2 | 0.00046  | 0.152  | 0.111  | NA |
| chr12 | 127384772 | 127384868 | 97  | 2 | 0.00154  | 0.184  | 0.184  | NA |
| chr5  | 76940356  | 76940449  | 94  | 2 | 0.00071  | 0.355  | 0.346  | NA |
| chr7  | 630473    | 630914    | 442 | 5 | 6.94E-08 | 0.421  | 0.335  | NA |
| chr7  | 73720808  | 73721031  | 224 | 3 | 0.00012  | 0.383  | 0.286  | NA |
| chr1  | 10757892  | 10758237  | 346 | 2 | 0.00046  | 0.333  | 0.159  | NA |
| chr16 | 86994949  | 86995081  | 133 | 3 | 0.00011  | 0.381  | 0.317  | NA |
| chr2  | 101008252 | 101008576 | 325 | 3 | 8.41E-06 | 0.259  | 0.243  | NA |
| chr17 | 79400831  | 79400976  | 146 | 3 | 0.00029  | 0.179  | 0.105  | NA |
| chr3  | 11519599  | 11519911  | 313 | 3 | 0.00013  | 0.167  | 0.159  | NA |
| chr2  | 9865398   | 9865477   | 80  | 2 | 0.00063  | 0.179  | 0.174  | NA |
| chr9  | 133794519 | 133794590 | 72  | 2 | 0.00422  | 0.251  | 0.223  | NA |
| chr2  | 101434082 | 101434611 | 530 | 2 | 0.00178  | 0.269  | 0.176  | NA |
| chr1  | 215993017 | 215993110 | 94  | 2 | 0.003    | 0.194  | 0.172  | NA |
| chr16 | 51026724  | 51026841  | 118 | 3 | 0.00039  | 0.453  | 0.396  | NA |
| chr1  | 228131966 | 228131977 | 12  | 2 | 0.00296  | 0.394  | 0.279  | NA |
| chr19 | 30935791  | 30936625  | 835 | 3 | 0.00054  | 0.136  | 0.082  | NA |

|       |           |           |      |   |          |        |        |    |
|-------|-----------|-----------|------|---|----------|--------|--------|----|
| chr6  | 7142024   | 7142066   | 43   | 2 | 0.00481  | 0.385  | 0.306  | NA |
| chr7  | 1949632   | 1949824   | 193  | 2 | 0.00077  | 0.221  | 0.148  | NA |
| chr2  | 54936739  | 54936822  | 84   | 2 | 0.00339  | -0.196 | -0.175 | NA |
| chr10 | 133048362 | 133048392 | 31   | 2 | 0.00083  | -0.252 | -0.246 | NA |
| chr11 | 8385712   | 8385767   | 56   | 2 | 0.00413  | 0.479  | 0.380  | NA |
| chr16 | 88935317  | 88935474  | 158  | 2 | 0.00059  | 0.547  | 0.366  | NA |
| chr1  | 3017674   | 3017794   | 121  | 2 | 0.00308  | 0.132  | 0.125  | NA |
| chr1  | 2792637   | 2792744   | 108  | 3 | 0.00092  | -0.252 | -0.237 | NA |
| chr6  | 1618814   | 1620137   | 1324 | 7 | 1.88E-09 | 0.493  | 0.340  | NA |
| chr5  | 2562302   | 2562830   | 529  | 2 | 0.0002   | 0.461  | 0.290  | NA |
| chr9  | 133413080 | 133413095 | 16   | 2 | 0.00099  | 0.383  | 0.280  | NA |
| chr3  | 177494108 | 177494197 | 90   | 2 | 0.00313  | 0.436  | 0.268  | NA |
| chr1  | 3289798   | 3289915   | 118  | 2 | 4.23E-05 | 0.235  | 0.186  | NA |
| chr6  | 106957404 | 106957497 | 94   | 2 | 0.00151  | 0.140  | 0.136  | NA |
| chr9  | 14350039  | 14350791  | 753  | 2 | 0.00184  | 0.489  | 0.397  | NA |
| chr16 | 31487813  | 31488238  | 426  | 3 | 0.00097  | -0.309 | -0.295 | NA |
| chr14 | 104741448 | 104742172 | 725  | 4 | 4.96E-06 | 0.379  | 0.257  | NA |
| chr1  | 27028974  | 27029290  | 317  | 2 | 0.0008   | 0.053  | 0.037  | NA |
| chr7  | 2239803   | 2240376   | 574  | 3 | 0.00031  | 0.060  | 0.025  | NA |
| chr2  | 3473852   | 3474169   | 318  | 2 | 0.00323  | 0.358  | 0.329  | NA |
| chr8  | 1707477   | 1707553   | 77   | 2 | 0.00403  | 0.247  | 0.208  | NA |
| chr17 | 77767084  | 77767242  | 159  | 2 | 0.00399  | 0.247  | 0.172  | NA |
| chr10 | 1260004   | 1260230   | 227  | 2 | 0.00262  | 0.129  | 0.101  | NA |
| chr1  | 3809431   | 3809532   | 102  | 2 | 0.00027  | 0.458  | 0.317  | NA |
| chr11 | 2603221   | 2603429   | 209  | 2 | 0.00349  | 0.052  | 0.050  | NA |
| chr22 | 46472568  | 46473721  | 1154 | 5 | 6.12E-05 | 0.307  | 0.215  | NA |
| chr7  | 57071509  | 57071676  | 168  | 2 | 0.00294  | -0.299 | -0.101 | NA |
| chr1  | 27687685  | 27687695  | 11   | 2 | 0.00333  | 0.124  | 0.117  | NA |
| chr17 | 77669181  | 77669222  | 42   | 3 | 0.00338  | 0.272  | 0.197  | NA |
| chr14 | 91738961  | 91739219  | 259  | 4 | 4.53E-06 | 0.441  | 0.291  | NA |

|       |           |           |      |    |          |        |        |    |
|-------|-----------|-----------|------|----|----------|--------|--------|----|
| chr7  | 788332    | 790384    | 2053 | 6  | 1.49E-05 | 0.582  | 0.162  | NA |
| chr10 | 30317625  | 30317994  | 370  | 3  | 2.32E-05 | 0.494  | 0.334  | NA |
| chr7  | 88315867  | 88315898  | 32   | 2  | 0.00391  | 0.116  | 0.091  | NA |
| chr1  | 3115085   | 3115545   | 461  | 4  | 1.31E-05 | 0.484  | 0.359  | NA |
| chr10 | 411741    | 411837    | 97   | 3  | 0.00232  | 0.143  | 0.131  | NA |
| chr15 | 96884949  | 96892116  | 7168 | 33 | 6.90E-17 | 0.428  | 0.234  | NA |
| chr1  | 3010896   | 3011304   | 409  | 3  | 1.79E-05 | 0.130  | 0.127  | NA |
| chr7  | 139164675 | 139164778 | 104  | 2  | 0.00308  | 0.313  | 0.076  | NA |
| chr2  | 240196078 | 240196284 | 207  | 3  | 0.00147  | 0.287  | 0.276  | NA |
| chr17 | 78039096  | 78039528  | 433  | 4  | 0.00053  | 0.307  | 0.274  | NA |
| chr7  | 668292    | 668612    | 321  | 2  | 0.00077  | 0.136  | 0.056  | NA |
| chr16 | 857454    | 857981    | 528  | 4  | 0.00067  | 0.267  | 0.235  | NA |
| chr10 | 131514248 | 131514331 | 84   | 2  | 9.65E-06 | -0.494 | -0.361 | NA |
| chr10 | 131697080 | 131697345 | 266  | 3  | 0.00168  | -0.321 | -0.267 | NA |
| chr3  | 156837590 | 156838403 | 814  | 6  | 2.43E-14 | -0.540 | -0.284 | NA |
| chr10 | 134821734 | 134822001 | 268  | 3  | 0.00245  | 0.111  | 0.108  | NA |
| chr11 | 2233644   | 2234043   | 400  | 2  | 0.00083  | -0.317 | -0.139 | NA |
| chr5  | 1016279   | 1016768   | 490  | 5  | 4.71E-07 | 0.225  | 0.156  | NA |
| chr4  | 7301491   | 7301823   | 333  | 3  | 0.00122  | 0.165  | 0.121  | NA |
| chr5  | 92684137  | 92684412  | 276  | 4  | 0.0022   | 0.396  | 0.306  | NA |
| chr16 | 88512529  | 88512653  | 125  | 2  | 0.00116  | -0.259 | -0.089 | NA |
| chr10 | 1156113   | 1156594   | 482  | 6  | 2.39E-06 | 0.333  | 0.173  | NA |
| chr7  | 2250050   | 2250274   | 225  | 2  | 0.00023  | 0.159  | 0.153  | NA |
| chr5  | 2442958   | 2443073   | 116  | 3  | 0.00349  | 0.295  | 0.184  | NA |
| chr21 | 46306688  | 46306794  | 107  | 3  | 0.00068  | 0.140  | 0.096  | NA |
| chr11 | 126286370 | 126287023 | 654  | 5  | 0.00057  | -0.240 | -0.211 | NA |
| chr19 | 49699879  | 49700427  | 549  | 4  | 0.00233  | 0.272  | 0.209  | NA |
| chr8  | 21964427  | 21964567  | 141  | 2  | 0.00107  | 0.206  | 0.149  | NA |
| chr3  | 13060741  | 13060974  | 234  | 4  | 0.00058  | 0.211  | 0.151  | NA |
| chr7  | 5258357   | 5258485   | 129  | 3  | 0.00017  | 0.202  | 0.087  | NA |

|       |           |           |      |   |          |        |        |    |
|-------|-----------|-----------|------|---|----------|--------|--------|----|
| chr1  | 15655764  | 15656086  | 323  | 3 | 0.00064  | 0.307  | 0.209  | NA |
| chr7  | 1864317   | 1864451   | 135  | 2 | 0.0016   | 0.190  | 0.138  | NA |
| chr14 | 102990211 | 102990501 | 291  | 3 | 0.0002   | -0.289 | -0.159 | NA |
| chr2  | 240032685 | 240033412 | 728  | 5 | 2.31E-05 | 0.161  | 0.084  | NA |
| chr18 | 77218862  | 77219495  | 634  | 3 | 0.00036  | 0.287  | 0.160  | NA |
| chr1  | 15541446  | 15541956  | 511  | 3 | 0.00315  | 0.467  | 0.202  | NA |
| chr16 | 85671191  | 85671771  | 581  | 4 | 0.00016  | -0.221 | -0.167 | NA |
| chr4  | 1029410   | 1029654   | 245  | 4 | 0.00021  | 0.304  | 0.224  | NA |
| chr10 | 134829832 | 134830157 | 326  | 2 | 0.00188  | 0.191  | 0.042  | NA |
| chr1  | 3379492   | 3379884   | 393  | 3 | 1.93E-05 | 0.192  | 0.109  | NA |
| chr1  | 91190891  | 91191232  | 342  | 4 | 0.00339  | 0.199  | 0.116  | NA |
| chr5  | 501343    | 502920    | 1578 | 7 | 3.09E-07 | 0.441  | 0.307  | NA |
| chr5  | 1054113   | 1054262   | 150  | 2 | 0.00341  | 0.126  | 0.085  | NA |
| chr16 | 88482626  | 88482940  | 315  | 3 | 0.00193  | 0.178  | 0.120  | NA |
| chr2  | 177036436 | 177036809 | 374  | 2 | 0.00088  | 0.177  | 0.076  | NA |
| chr17 | 1478889   | 1479213   | 325  | 2 | 0.00354  | 0.361  | 0.265  | NA |
| chr6  | 168811070 | 168811287 | 218  | 3 | 0.00018  | 0.426  | 0.299  | NA |
| chr7  | 1233285   | 1233469   | 185  | 2 | 0.00059  | -0.265 | -0.065 | NA |
| chr17 | 80827952  | 80827971  | 20   | 2 | 0.00272  | 0.072  | 0.045  | NA |
| chr13 | 112905729 | 112905775 | 47   | 3 | 0.00154  | -0.078 | -0.044 | NA |
| chr4  | 2275801   | 2276044   | 244  | 5 | 0.00021  | 0.202  | 0.136  | NA |
| chr14 | 95330880  | 95331466  | 587  | 5 | 1.05E-08 | -0.329 | -0.227 | NA |
| chr7  | 21209338  | 21209781  | 444  | 4 | 0.00098  | 0.401  | 0.288  | NA |
| chr4  | 7373022   | 7373451   | 430  | 5 | 0.00052  | -0.403 | -0.246 | NA |
| chr1  | 41978691  | 41979124  | 434  | 5 | 9.36E-08 | 0.224  | 0.120  | NA |
| chr1  | 16318931  | 16318994  | 64   | 2 | 0.00063  | 0.121  | 0.101  | NA |
| chr17 | 79412583  | 79412788  | 206  | 4 | 0.00343  | 0.181  | 0.059  | NA |
| chr22 | 43058692  | 43059020  | 329  | 2 | 0.00028  | -0.230 | -0.092 | NA |
| chr10 | 133743048 | 133743453 | 406  | 3 | 0.00029  | 0.283  | 0.049  | NA |
| chr11 | 64146487  | 64146871  | 385  | 4 | 0.00155  | 0.376  | 0.224  | NA |

|       |           |           |      |   |          |        |        |    |
|-------|-----------|-----------|------|---|----------|--------|--------|----|
| chr15 | 98937633  | 98937852  | 220  | 2 | 0.00273  | 0.382  | 0.220  | NA |
| chr5  | 510035    | 510421    | 387  | 3 | 0.00083  | 0.425  | 0.261  | NA |
| chr6  | 41528345  | 41529269  | 925  | 8 | 1.75E-07 | 0.463  | 0.341  | NA |
| chr19 | 16643451  | 16644066  | 616  | 3 | 3.29E-05 | -0.148 | 0.008  | NA |
| chr1  | 9078214   | 9078477   | 264  | 3 | 0.00094  | 0.222  | 0.161  | NA |
| chr2  | 121970401 | 121970600 | 200  | 3 | 0.00055  | 0.181  | 0.081  | NA |
| chr21 | 27372387  | 27372461  | 75   | 4 | 0.00231  | 0.151  | 0.106  | NA |
| chr17 | 72839038  | 72839750  | 713  | 3 | 5.23E-05 | 0.230  | 0.102  | NA |
| chr15 | 96952113  | 96952425  | 313  | 4 | 8.78E-05 | -0.355 | -0.199 | NA |
| chr14 | 105676791 | 105677543 | 753  | 4 | 1.13E-05 | 0.216  | 0.109  | NA |
| chr6  | 110721138 | 110721629 | 492  | 4 | 0.00262  | -0.205 | -0.097 | NA |
| chr20 | 44978848  | 44979100  | 253  | 2 | 0.0022   | 0.126  | 0.108  | NA |
| chr22 | 30125353  | 30125483  | 131  | 2 | 0.00265  | 0.161  | 0.078  | NA |
| chr12 | 30976867  | 30976950  | 84   | 2 | 0.00117  | 0.301  | 0.156  | NA |
| chr15 | 53075877  | 53076235  | 359  | 2 | 2.68E-05 | 0.183  | 0.106  | NA |
| chr7  | 4786364   | 4786986   | 623  | 6 | 0.00017  | 0.239  | 0.139  | NA |
| chr13 | 68682018  | 68682777  | 760  | 3 | 0.00092  | 0.202  | 0.122  | NA |
| chr2  | 3691145   | 3691651   | 507  | 6 | 0.00065  | 0.184  | 0.090  | NA |
| chr6  | 33272880  | 33273014  | 135  | 4 | 0.00064  | 0.260  | 0.168  | NA |
| chr3  | 113417997 | 113418063 | 67   | 3 | 0.0028   | 0.192  | 0.073  | NA |
| chr1  | 2221807   | 2222674   | 868  | 5 | 0.00032  | 0.225  | 0.132  | NA |
| chr7  | 155261034 | 155261402 | 369  | 4 | 0.00045  | 0.214  | 0.087  | NA |
| chr6  | 44528765  | 44529157  | 393  | 5 | 9.90E-07 | 0.328  | 0.206  | NA |
| chr2  | 66804865  | 66805939  | 1075 | 6 | 5.65E-05 | 0.346  | 0.159  | NA |
| chr6  | 106582638 | 106583218 | 581  | 5 | 2.64E-08 | 0.338  | 0.180  | NA |
| chr1  | 2999196   | 2999728   | 533  | 4 | 0.00033  | 0.231  | 0.129  | NA |
| chr3  | 11600100  | 11600407  | 308  | 2 | 0.00032  | 0.239  | 0.162  | NA |
| chr6  | 166422626 | 166422741 | 116  | 3 | 0.00215  | 0.160  | 0.068  | NA |
| chr1  | 85721250  | 85721327  | 78   | 2 | 0.00436  | 0.174  | 0.034  | NA |
| chr13 | 111061780 | 111062287 | 508  | 5 | 0.00059  | 0.222  | 0.128  | NA |

|       |           |           |      |   |          |        |        |    |
|-------|-----------|-----------|------|---|----------|--------|--------|----|
| chr5  | 126564606 | 126565042 | 437  | 4 | 0.00018  | 0.257  | 0.122  | NA |
| chr10 | 532287    | 532908    | 622  | 5 | 0.00011  | 0.273  | 0.147  | NA |
| chr4  | 155253864 | 155254602 | 739  | 6 | 6.94E-08 | -0.462 | -0.255 | NA |
| chr7  | 113722758 | 113723786 | 1029 | 7 | 4.36E-11 | 0.556  | 0.378  | NA |
| chr3  | 176862885 | 176862949 | 65   | 2 | 0.00407  | 0.143  | 0.061  | NA |
| chr21 | 45575014  | 45575832  | 819  | 4 | 0.0001   | 0.318  | 0.159  | NA |
| chr2  | 121523609 | 121523682 | 74   | 3 | 0.0016   | 0.179  | 0.110  | NA |
| chr2  | 105853494 | 105853672 | 179  | 3 | 0.00333  | -0.298 | -0.218 | NA |
| chr10 | 105362388 | 105362799 | 412  | 4 | 0.00063  | 0.197  | 0.042  | NA |
| chr1  | 1062237   | 1063186   | 950  | 3 | 0.00038  | 0.231  | 0.119  | NA |
| chr4  | 4856820   | 4857441   | 622  | 5 | 0.0017   | 0.254  | 0.162  | NA |
| chr5  | 158478533 | 158478734 | 202  | 3 | 0.00058  | 0.150  | 0.008  | NA |
| chr17 | 78865087  | 78866579  | 1493 | 9 | 4.68E-07 | 0.384  | 0.274  | NA |
| chr15 | 100533202 | 100533336 | 135  | 4 | 0.00375  | 0.182  | 0.105  | NA |
| chr2  | 128185947 | 128186748 | 802  | 5 | 1.07E-05 | 0.117  | 0.060  | NA |
| chr3  | 12856650  | 12856862  | 213  | 4 | 0.00382  | 0.148  | 0.054  | NA |
| chr12 | 54089240  | 54089486  | 247  | 3 | 0.00114  | 0.230  | 0.089  | NA |
| chr1  | 3352257   | 3352544   | 288  | 3 | 0.00267  | 0.131  | 0.093  | NA |
| chr20 | 3730680   | 3730943   | 264  | 2 | 0.00213  | 0.049  | 0.047  | NA |
| chr16 | 84336042  | 84336445  | 404  | 4 | 0.00039  | 0.484  | 0.274  | NA |
| chr6  | 29987762  | 29988222  | 461  | 4 | 0.00141  | 0.212  | 0.095  | NA |
| chr7  | 1034817   | 1035418   | 602  | 5 | 7.30E-08 | 0.199  | 0.074  | NA |
| chr11 | 1483099   | 1483169   | 71   | 2 | 0.00349  | -0.208 | -0.097 | NA |
| chr6  | 29980634  | 29980960  | 327  | 2 | 2.82E-06 | 0.182  | 0.106  | NA |
| chr3  | 11597868  | 11597941  | 74   | 3 | 0.00138  | 0.302  | 0.198  | NA |
| chr16 | 90002255  | 90002892  | 638  | 5 | 1.97E-05 | 0.194  | 0.128  | NA |
| chr22 | 37603155  | 37603819  | 665  | 4 | 0.00037  | 0.194  | 0.095  | NA |
| chr2  | 242713790 | 242714091 | 302  | 4 | 0.00045  | -0.386 | -0.159 | NA |
| chr6  | 156718177 | 156718546 | 370  | 5 | 0.0023   | 0.361  | 0.198  | NA |
| chr7  | 155276437 | 155276880 | 444  | 5 | 0.00011  | 0.312  | 0.168  | NA |

|       |           |           |      |    |          |        |        |    |
|-------|-----------|-----------|------|----|----------|--------|--------|----|
| chr6  | 37673335  | 37673439  | 105  | 2  | 0.00483  | 0.022  | 0.013  | NA |
| chr12 | 131237654 | 131237708 | 55   | 3  | 0.00373  | -0.260 | -0.152 | NA |
| chr1  | 2827410   | 2828293   | 884  | 8  | 7.00E-10 | 0.367  | 0.217  | NA |
| chr8  | 1310380   | 1310451   | 72   | 2  | 0.00079  | 0.190  | 0.112  | NA |
| chr19 | 7541760   | 7542191   | 432  | 4  | 1.06E-05 | 0.278  | 0.112  | NA |
| chr5  | 42994709  | 42995527  | 819  | 7  | 2.02E-05 | 0.185  | 0.085  | NA |
| chr7  | 73894884  | 73895278  | 395  | 5  | 0.00323  | -0.043 | 0.009  | NA |
| chr8  | 26047780  | 26048414  | 635  | 7  | 0.00063  | 0.173  | 0.088  | NA |
| chr14 | 99613193  | 99613313  | 121  | 3  | 0.00336  | 0.177  | 0.030  | NA |
| chr5  | 2743124   | 2743655   | 532  | 5  | 0.00037  | 0.188  | 0.083  | NA |
| chr15 | 70326224  | 70326383  | 160  | 3  | 0.00273  | 0.387  | 0.201  | NA |
| chr10 | 407721    | 407935    | 215  | 3  | 0.00343  | 0.244  | 0.002  | NA |
| chr2  | 66809780  | 66810606  | 827  | 8  | 7.24E-05 | 0.354  | 0.170  | NA |
| chr12 | 121687747 | 121688459 | 713  | 5  | 0.00039  | 0.191  | 0.110  | NA |
| chr7  | 65878352  | 65878976  | 625  | 5  | 0.00264  | 0.416  | 0.097  | NA |
| chr10 | 125033770 | 125034002 | 233  | 4  | 0.00178  | -0.304 | -0.172 | NA |
| chr19 | 17439208  | 17439339  | 132  | 2  | 0.00289  | 0.208  | 0.096  | NA |
| chr15 | 72581569  | 72582316  | 748  | 4  | 0.00121  | 0.229  | 0.131  | NA |
| chr4  | 1558451   | 1559244   | 794  | 6  | 2.16E-05 | 0.386  | 0.068  | NA |
| chr7  | 55224743  | 55225183  | 441  | 6  | 0.00331  | 0.207  | 0.068  | NA |
| chr16 | 898973    | 899108    | 136  | 3  | 0.00115  | 0.143  | 0.088  | NA |
| chr12 | 132680733 | 132680972 | 240  | 3  | 0.00053  | 0.281  | 0.164  | NA |
| chr8  | 143192949 | 143193131 | 183  | 3  | 0.00105  | 0.177  | 0.113  | NA |
| chr16 | 85478769  | 85479301  | 533  | 6  | 0.00051  | 0.220  | 0.064  | NA |
| chr10 | 114610560 | 114610803 | 244  | 4  | 1.59E-08 | 0.153  | 0.100  | NA |
| chr17 | 80137075  | 80137377  | 303  | 3  | 0.00275  | 0.186  | 0.081  | NA |
| chr18 | 77193464  | 77193759  | 296  | 4  | 5.11E-05 | 0.079  | 0.056  | NA |
| chr2  | 172972681 | 172974819 | 2139 | 10 | 0.00194  | 0.461  | -0.036 | NA |
| chr17 | 46795860  | 46797042  | 1183 | 6  | 0.00012  | 0.341  | 0.130  | NA |
| chr20 | 61590751  | 61591209  | 459  | 4  | 0.00143  | 0.252  | 0.065  | NA |

|       |           |           |      |    |          |        |        |    |
|-------|-----------|-----------|------|----|----------|--------|--------|----|
| chr8  | 142179697 | 142180543 | 847  | 5  | 2.57E-05 | -0.127 | -0.003 | NA |
| chr7  | 16438022  | 16438851  | 830  | 7  | 0.0021   | 0.089  | 0.018  | NA |
| chr6  | 28446794  | 28447115  | 322  | 5  | 0.00332  | 0.242  | 0.157  | NA |
| chr16 | 46461209  | 46461571  | 363  | 2  | 0.00093  | -0.292 | -0.149 | NA |
| chr2  | 198029141 | 198029332 | 192  | 3  | 0.00127  | -0.321 | -0.215 | NA |
| chr5  | 1154848   | 1154998   | 151  | 3  | 9.43E-07 | 0.297  | 0.056  | NA |
| chr5  | 122421195 | 122421508 | 314  | 2  | 0.00018  | 0.318  | 0.161  | NA |
| chr12 | 66122497  | 66123496  | 1000 | 6  | 0.00012  | 0.363  | 0.167  | NA |
| chr11 | 59317890  | 59318534  | 645  | 5  | 0.00097  | -0.113 | -0.042 | NA |
| chr17 | 78795392  | 78795669  | 278  | 3  | 0.00139  | 0.191  | 0.045  | NA |
| chr19 | 48956129  | 48956265  | 137  | 3  | 0.00039  | 0.065  | 0.036  | NA |
| chr11 | 132948586 | 132949126 | 541  | 3  | 0.0011   | 0.184  | 0.047  | NA |
| chr10 | 102986306 | 102986686 | 381  | 5  | 0.00248  | 0.061  | 0.016  | NA |
| chr17 | 80303530  | 80303714  | 185  | 4  | 6.25E-06 | 0.202  | 0.059  | NA |
| chr12 | 53183773  | 53184041  | 269  | 4  | 0.00127  | 0.195  | 0.105  | NA |
| chr1  | 47009527  | 47010223  | 697  | 7  | 0.00203  | 0.214  | 0.021  | NA |
| chr7  | 1250038   | 1250756   | 719  | 10 | 0.0002   | 0.338  | 0.124  | NA |
| chr7  | 4175030   | 4175403   | 374  | 4  | 0.0022   | 0.086  | 0.054  | NA |
| chr6  | 100916916 | 100917206 | 291  | 4  | 0.00358  | -0.293 | -0.016 | NA |
| chr1  | 3229075   | 3229195   | 121  | 2  | 0.00252  | 0.227  | 0.113  | NA |
| chr12 | 132899503 | 132900274 | 772  | 4  | 0.0003   | -0.237 | -0.032 | NA |
| chr6  | 161575229 | 161575667 | 439  | 7  | 0.00274  | 0.178  | 0.027  | NA |
| chr22 | 31301703  | 31302132  | 430  | 3  | 0.00013  | 0.142  | 0.058  | NA |
| chr6  | 32042526  | 32043029  | 504  | 4  | 0.00267  | 0.180  | 0.053  | NA |
| chr8  | 1398411   | 1398679   | 269  | 2  | 3.55E-05 | 0.170  | 0.085  | NA |
| chr8  | 1132142   | 1133105   | 964  | 6  | 0.00041  | 0.163  | 0.080  | NA |
| chr5  | 72593919  | 72594851  | 933  | 5  | 0.00132  | 0.252  | -0.012 | NA |
| chr20 | 62031739  | 62031924  | 186  | 2  | 0.00353  | 0.190  | 0.092  | NA |
| chr16 | 88568209  | 88568629  | 421  | 3  | 0.00251  | 0.100  | 0.029  | NA |
| chr6  | 32026049  | 32026891  | 843  | 10 | 3.58E-05 | 0.210  | 0.121  | NA |



|       |           |           |      |    |          |        |        |           |
|-------|-----------|-----------|------|----|----------|--------|--------|-----------|
| chr1  | 22446397  | 22446854  | 458  | 6  | 0.00373  | 0.097  | 0.020  | NA        |
| chr6  | 32028831  | 32029216  | 386  | 8  | 0.00301  | -0.160 | 0.068  | NA        |
| chr6  | 32054441  | 32055146  | 706  | 14 | 0.0002   | 0.390  | 0.115  | NA        |
| chr12 | 130501688 | 130502586 | 899  | 11 | 4.47E-06 | 0.366  | 0.212  | NA        |
| chr6  | 31827858  | 31828373  | 516  | 13 | 0.00108  | 0.160  | 0.029  | NA        |
| chr6  | 108479144 | 108479584 | 441  | 6  | 0.00058  | 0.207  | 0.085  | NA        |
| chr2  | 241721320 | 241722281 | 962  | 6  | 6.96E-06 | 0.168  | 0.014  | NA        |
| chr6  | 32050905  | 32052596  | 1692 | 16 | 0.00013  | 0.186  | 0.069  | NA        |
| chr10 | 556470    | 557109    | 640  | 4  | 0.00045  | 0.094  | 0.021  | NA        |
| chr1  | 17004192  | 17004808  | 617  | 5  | 0.00026  | 0.125  | 0.032  | NA        |
| chr6  | 32063991  | 32065043  | 1053 | 34 | 7.09E-06 | 0.243  | -0.034 | NA        |
| chr19 | 50861774  | 50862121  | 348  | 5  | 9.57E-05 | 0.415  | 0.234  | NAPSA     |
| chr2  | 232348334 | 232348794 | 461  | 4  | 0.00029  | 0.431  | 0.334  | NCL       |
| chr19 | 19626251  | 19626605  | 355  | 6  | 0.00098  | -0.285 | -0.137 | NDUFA13   |
| chr4  | 1993350   | 1993409   | 60   | 3  | 0.00451  | 0.060  | 0.042  | NELFA     |
| chr17 | 46125312  | 46125678  | 367  | 7  | 0.00203  | -0.037 | -0.009 | NFE2L1    |
| chr19 | 13121571  | 13125851  | 4281 | 15 | 1.05E-13 | 0.509  | 0.324  | NFIX      |
| chr2  | 233877857 | 233878714 | 858  | 6  | 5.55E-05 | 0.270  | 0.047  | NGEF      |
| chr20 | 61884645  | 61885448  | 804  | 8  | 0.00169  | -0.136 | -0.006 | NKAIN4    |
| chr6  | 28226885  | 28227482  | 598  | 11 | 0.00012  | -0.360 | -0.129 | NKAPL     |
| chr10 | 134600477 | 134600998 | 522  | 12 | 0.00172  | 0.017  | 0.006  | NKX6      |
| chr17 | 33469064  | 33469488  | 425  | 6  | 0.00332  | 0.066  | 0.012  | NLE1      |
| chr17 | 7311030   | 7311742   | 713  | 5  | 9.12E-05 | 0.327  | 0.127  | NLGN2     |
| chr2  | 32490766  | 32490835  | 70   | 2  | 0.00031  | 0.328  | 0.245  | NLRC4     |
| chr14 | 24768737  | 24769404  | 668  | 14 | 0.00233  | -0.020 | 0.002  | NOP9      |
| chr6  | 32179567  | 32180641  | 1075 | 8  | 7.25E-06 | 0.532  | 0.285  | NOTCH4    |
| chr5  | 32713290  | 32713464  | 175  | 2  | 0.00353  | -0.126 | -0.034 | NPR3      |
| chr15 | 72102874  | 72103908  | 1035 | 6  | 2.92E-06 | 0.176  | 0.127  | NR2E3     |
| chr15 | 96866537  | 96867150  | 614  | 3  | 9.38E-06 | 0.318  | 0.213  | NR2F2-AS1 |
| chr1  | 200010708 | 200011858 | 1151 | 9  | 0.00048  | 0.214  | 0.066  | NR5A2     |

|       |           |           |      |    |          |        |        |          |
|-------|-----------|-----------|------|----|----------|--------|--------|----------|
| chr7  | 129252859 | 129253169 | 311  | 2  | 9.38E-05 | 0.422  | 0.212  | NRF1     |
| chr3  | 52569026  | 52569169  | 144  | 4  | 0.00096  | -0.133 | -0.069 | NT5DC2   |
| chr12 | 96184415  | 96184580  | 166  | 3  | 0.00348  | 0.015  | 0.008  | NTN4     |
| chr4  | 123841683 | 123841798 | 116  | 2  | 3.03E-07 | 0.523  | 0.368  | NUDT6    |
| chr19 | 2268580   | 2269166   | 587  | 3  | 0.00282  | -0.088 | -0.023 | OAZ1     |
| chr20 | 45179157  | 45179413  | 257  | 5  | 1.36E-07 | 0.477  | 0.335  | OCSTAMP  |
| chr21 | 34444104  | 34444382  | 279  | 4  | 0.00289  | 0.283  | 0.114  | OLIG1    |
| chr11 | 58036997  | 58037105  | 109  | 2  | 0.00133  | 0.265  | 0.208  | OR10W1   |
| chr17 | 3213470   | 3213559   | 90   | 2  | 0.00039  | 0.138  | 0.081  | OR3A4P   |
| chr16 | 30960055  | 30960864  | 810  | 9  | 4.55E-06 | -0.031 | -0.003 | ORAI3    |
| chr2  | 241078542 | 241078763 | 222  | 2  | 0.00052  | 0.136  | 0.102  | OTOS     |
| chr17 | 79801347  | 79801407  | 61   | 2  | 0.00414  | 0.116  | 0.095  | P4HB     |
| chr2  | 147344230 | 147344418 | 189  | 2  | 0.00108  | 0.066  | 0.062  | PABPC1P2 |
| chr14 | 105779532 | 105779910 | 379  | 4  | 0.00234  | 0.279  | 0.158  | PACS2    |
| chr14 | 105851329 | 105851951 | 623  | 4  | 5.71E-05 | 0.195  | 0.082  | PACS2    |
| chr7  | 139760375 | 139760671 | 297  | 2  | 0.00339  | 0.211  | 0.170  | PARP12   |
| chr22 | 44568337  | 44568812  | 476  | 8  | 3.00E-06 | 0.199  | 0.126  | PARVG    |
| chr11 | 31832353  | 31833477  | 1125 | 14 | 0.0002   | 0.199  | 0.035  | PAX6     |
| chr6  | 32155079  | 32155141  | 63   | 3  | 0.00207  | -0.208 | -0.090 | PBX2     |
| chr4  | 30724564  | 30724915  | 352  | 3  | 0.00127  | -0.213 | -0.188 | PCDH7    |
| chr17 | 79868964  | 79869463  | 500  | 10 | 7.87E-05 | 0.016  | 0.006  | PCYT2    |
| chr11 | 72379867  | 72380070  | 204  | 2  | 0.00436  | 0.311  | 0.259  | PDE2A    |
| chr4  | 656994    | 657074    | 81   | 2  | 0.00229  | -0.208 | -0.193 | PDE6B    |
| chr1  | 146649022 | 146649851 | 830  | 5  | 1.20E-05 | 0.331  | 0.240  | PDIA3P1  |
| chr7  | 95225937  | 95226433  | 497  | 7  | 0.0004   | 0.189  | 0.070  | PDK4     |
| chr10 | 6243561   | 6244010   | 450  | 5  | 0.00072  | -0.053 | -0.003 | PFKFB3   |
| chr14 | 75423089  | 75423131  | 43   | 3  | 0.00451  | -0.021 | -0.016 | PGF      |
| chr18 | 11147146  | 11148932  | 1787 | 9  | 6.35E-07 | -0.314 | -0.133 | PIEZO2   |
| chr10 | 104000446 | 104000831 | 386  | 2  | 0.00242  | 0.226  | 0.176  | PITX3    |
| chr16 | 2145598   | 2145668   | 71   | 2  | 0.00439  | 0.141  | 0.111  | PKD1     |

|       |           |           |      |    |          |        |        |          |
|-------|-----------|-----------|------|----|----------|--------|--------|----------|
| chr11 | 404596    | 404762    | 167  | 3  | 0.00235  | 0.125  | 0.036  | PKP3     |
| chr12 | 14720249  | 14721288  | 1040 | 12 | 5.56E-06 | -0.142 | -0.038 | PLBD1    |
| chr3  | 155421735 | 155422754 | 1020 | 7  | 0.00014  | 0.423  | 0.232  | PLCH1    |
| chr17 | 17108846  | 17110353  | 1508 | 16 | 2.09E-06 | 0.185  | 0.094  | PLD6     |
| chr11 | 112132630 | 112132648 | 19   | 2  | 0.00419  | 0.114  | 0.064  | PLET1    |
| chr1  | 53544373  | 53544614  | 242  | 3  | 0.00178  | 0.164  | 0.077  | PODN     |
| chr21 | 46686908  | 46687659  | 752  | 4  | 4.50E-06 | 0.238  | 0.078  | POFUT2   |
| chr8  | 22102556  | 22102902  | 347  | 7  | 0.00207  | 0.013  | 0.006  | POLR3D   |
| chr1  | 167190178 | 167190631 | 454  | 3  | 0.00092  | 0.072  | 0.030  | POU2F1   |
| chr13 | 79177195  | 79177520  | 326  | 4  | 0.00363  | 0.011  | 0.010  | POU4F1   |
| chr17 | 42018862  | 42019987  | 1126 | 5  | 6.00E-05 | 0.152  | 0.032  | PPY      |
| chr17 | 46799479  | 46800444  | 966  | 9  | 4.03E-05 | -0.256 | -0.042 | PRAC1    |
| chr10 | 135160120 | 135160193 | 74   | 2  | 0.0005   | 0.318  | 0.262  | PRAP1    |
| chr11 | 45114570  | 45114842  | 273  | 2  | 0.00025  | 0.238  | 0.178  | PRDM11   |
| chr2  | 44589600  | 44589694  | 95   | 2  | 0.00239  | 0.020  | 0.016  | PREPL    |
| chr19 | 14225172  | 14225959  | 788  | 4  | 0.00013  | 0.287  | 0.094  | PRKACA   |
| chr17 | 27039058  | 27039523  | 466  | 4  | 0.00246  | -0.236 | -0.124 | PROCA1   |
| chr20 | 5294595   | 5295137   | 543  | 2  | 0.00216  | 0.207  | 0.159  | PROKR2   |
| chr7  | 29605624  | 29606349  | 726  | 6  | 7.70E-06 | 0.275  | 0.227  | PRR15    |
| chr12 | 11001596  | 11002609  | 1014 | 6  | 3.78E-11 | 0.504  | 0.342  | PRR4     |
| chr22 | 45125218  | 45126040  | 823  | 5  | 2.90E-09 | 0.261  | 0.095  | PRR5     |
| chr6  | 32115964  | 32116317  | 354  | 9  | 3.68E-05 | 0.195  | 0.086  | PRRT1    |
| chr16 | 2866901   | 2867446   | 546  | 4  | 3.93E-05 | 0.277  | 0.173  | PRSS21   |
| chr19 | 696832    | 696946    | 115  | 3  | 0.00084  | 0.228  | 0.009  | PRSS57   |
| chr6  | 31108108  | 31108541  | 434  | 2  | 0.0014   | 0.207  | 0.181  | PSORS1C2 |
| chr1  | 161059267 | 161059535 | 269  | 5  | 0.00245  | 0.043  | 0.030  | PVRL4    |
| chr4  | 122302674 | 122302680 | 7    | 2  | 0.00441  | 0.303  | 0.298  | QRFPR    |
| chr22 | 23487027  | 23487104  | 78   | 3  | 0.00277  | -0.411 | -0.216 | RAB36    |
| chr20 | 55925570  | 55925603  | 34   | 3  | 0.00014  | -0.308 | -0.278 | RAE1     |
| chr7  | 150039342 | 150039406 | 65   | 3  | 0.00156  | 0.173  | 0.125  | RARRES2  |

|       |           |           |      |    |          |        |        |               |
|-------|-----------|-----------|------|----|----------|--------|--------|---------------|
| chr15 | 79382708  | 79383560  | 853  | 8  | 0.00033  | 0.091  | 0.014  | RASGRF1       |
| chr3  | 50377836  | 50379032  | 1197 | 13 | 0.00067  | 0.159  | 0.024  | RASSF1        |
| chr1  | 206729553 | 206729685 | 133  | 3  | 0.00339  | 0.157  | 0.096  | RASSF5        |
| chr12 | 86230825  | 86230957  | 133  | 2  | 0.0018   | -0.316 | -0.224 | RASSF9        |
| chr6  | 17280740  | 17281015  | 276  | 2  | 0.00175  | 0.211  | 0.196  | RBM24         |
| chr2  | 161265247 | 161265366 | 120  | 4  | 0.00342  | 0.238  | 0.196  | RBMS1         |
| chr13 | 49066868  | 49066969  | 102  | 2  | 0.00358  | 0.420  | 0.357  | RCBTB2        |
| chr4  | 3417677   | 3418564   | 888  | 4  | 6.65E-05 | 0.304  | 0.156  | RGS12         |
| chr1  | 113249654 | 113249989 | 336  | 5  | 0.00012  | 0.016  | 0.009  | RHOC          |
| chr1  | 41131970  | 41132022  | 53   | 2  | 0.00317  | -0.272 | -0.211 | RIMS3         |
| chr19 | 39360313  | 39360961  | 649  | 4  | 0.00108  | 0.250  | 0.142  | RINL          |
| chr4  | 190935955 | 190936289 | 335  | 2  | 0.00019  | 0.237  | 0.166  | RNA5SP174     |
| chr17 | 55122747  | 55123653  | 907  | 5  | 7.93E-05 | -0.355 | -0.245 | RNF126P1      |
| chr10 | 90342738  | 90343285  | 548  | 9  | 3.48E-08 | 0.124  | 0.068  | RNLS          |
| chr12 | 6586821   | 6587072   | 252  | 4  | 0.00013  | 0.072  | 0.038  | RP1-102E24.6  |
| chr17 | 79430641  | 79430805  | 165  | 2  | 0.00137  | 0.087  | 0.069  | RP11-1055B8.7 |
| chr10 | 135203102 | 135203200 | 99   | 2  | 0.00064  | 0.253  | 0.218  | PAOX          |
| chr1  | 16074114  | 16074463  | 350  | 2  | 0.00033  | 0.137  | 0.108  | RP11-169K16.4 |
| chr1  | 202407864 | 202408238 | 375  | 3  | 0.00137  | 0.056  | 0.034  | RP11-175B9.2  |
| chr3  | 27754049  | 27755600  | 1552 | 11 | 1.80E-05 | 0.131  | 0.067  | RP11-222K16.2 |
| chr1  | 167131969 | 167132065 | 97   | 4  | 4.66E-05 | 0.313  | 0.156  | RP11-277B15.1 |
| chr6  | 58399599  | 58399793  | 195  | 3  | 0.00074  | 0.130  | 0.092  | RP11-278J20.2 |
| chr10 | 134596873 | 134596989 | 117  | 3  | 0.00225  | 0.130  | 0.057  | RP11-288G11.3 |
| chr1  | 146521800 | 146522878 | 1079 | 6  | 4.69E-07 | 0.148  | 0.032  | RP11-325P15.1 |
| chr6  | 41471673  | 41472657  | 985  | 6  | 0.00066  | 0.319  | 0.103  | RP11-328M4.3  |

|       |           |           |      |    |          |        |        |               |
|-------|-----------|-----------|------|----|----------|--------|--------|---------------|
| chr17 | 59472854  | 59473124  | 271  | 2  | 0.00047  | 0.194  | 0.141  | RP11-332H18.4 |
| chr8  | 136245867 | 136246255 | 389  | 3  | 4.26E-05 | 0.567  | 0.331  | RP11-452N4.1  |
| chr16 | 34441787  | 34442602  | 816  | 4  | 0.00207  | -0.278 | -0.140 | RP11-488I20.8 |
| chr15 | 96894342  | 96895542  | 1201 | 6  | 1.62E-06 | 0.465  | 0.405  | RP11-522B15.3 |
| chr15 | 96896940  | 96897796  | 857  | 4  | 0.00055  | 0.347  | 0.185  | RP11-522B15.3 |
| chr14 | 20148103  | 20148125  | 23   | 2  | 0.00257  | 0.074  | 0.017  | RP11-597A11.2 |
| chr6  | 39869689  | 39869840  | 152  | 3  | 0.00203  | 0.160  | 0.107  | RP11-61I13.3  |
| chr5  | 980580    | 981189    | 610  | 6  | 0.00032  | 0.498  | 0.247  | RP11-661C8.3  |
| chr1  | 148853922 | 148854588 | 667  | 4  | 0.00035  | 0.062  | 0.037  | RP11-763B22.7 |
| chr11 | 106698562 | 106698694 | 133  | 3  | 0.0018   | 0.131  | 0.064  | RP11-819M15.1 |
| chr12 | 52215972  | 52216298  | 327  | 5  | 0.00212  | 0.098  | 0.031  | RP11-923I11.7 |
| chr9  | 91267411  | 91267587  | 177  | 2  | 0.00028  | 0.457  | 0.264  | RP13-60M5.2   |
| chr6  | 33868187  | 33868313  | 127  | 3  | 0.00343  | -0.172 | 0.008  | RP3-468B3.2   |
| chr11 | 30605411  | 30605797  | 387  | 5  | 0.00242  | 0.240  | 0.158  | RP5-1024C24.1 |
| chr3  | 40498475  | 40499408  | 934  | 7  | 8.65E-08 | 0.050  | 0.007  | RPL14         |
| chr10 | 88391658  | 88391965  | 308  | 3  | 0.00356  | -0.235 | -0.164 | RPL7AP8       |
| chr6  | 30312580  | 30313517  | 938  | 28 | 0.00071  | 0.219  | 0.008  | RPP21         |
| chr1  | 26869620  | 26870173  | 554  | 2  | 9.41E-05 | 0.144  | 0.134  | RPS6KA1       |
| chr19 | 45999794  | 46000154  | 361  | 5  | 0.00339  | 0.088  | 0.028  | RTN2          |
| chr1  | 25254746  | 25255003  | 258  | 2  | 0.00144  | 0.174  | 0.120  | RUNX3         |
| chr1  | 25256939  | 25258679  | 1741 | 25 | 2.44E-21 | -0.553 | -0.276 | RUNX3         |
| chr19 | 39055712  | 39056216  | 505  | 4  | 0.00327  | 0.156  | 0.139  | RYR1          |
| chr13 | 24007965  | 24008109  | 145  | 3  | 0.00106  | 0.315  | 0.084  | SACS          |
| chr1  | 879375    | 879415    | 41   | 3  | 0.00234  | 0.154  | 0.110  | SAMD11        |
| chr17 | 48194500  | 48195107  | 608  | 5  | 6.88E-05 | 0.132  | 0.041  | SAMD14        |

|       |           |           |      |    |          |        |        |            |
|-------|-----------|-----------|------|----|----------|--------|--------|------------|
| chr6  | 28557047  | 28558113  | 1067 | 24 | 2.69E-06 | 0.452  | 0.091  | SCAND3     |
| chr19 | 35068221  | 35069691  | 1471 | 7  | 0.00029  | 0.284  | 0.117  | SCGB1B2P   |
| chr2  | 20425981  | 20426146  | 166  | 2  | 0.00117  | 0.220  | 0.115  | SDC1       |
| chr19 | 36485282  | 36485972  | 691  | 7  | 0.00022  | 0.286  | 0.118  | SDHAF1     |
| chr17 | 71434003  | 71434052  | 50   | 3  | 9.82E-06 | 0.269  | 0.167  | SDK2       |
| chr16 | 82044738  | 82045222  | 485  | 8  | 6.48E-06 | 0.177  | 0.101  | SDR42E1    |
| chr22 | 30792674  | 30793438  | 765  | 9  | 0.00026  | -0.017 | 0.005  | SEC14L2    |
| chr10 | 102731539 | 102732605 | 1067 | 9  | 0.0003   | 0.200  | 0.068  | SEMA4G     |
| chr15 | 74725882  | 74726520  | 639  | 10 | 0.00272  | -0.034 | -0.006 | SEMA7A     |
| chr10 | 13391488  | 13392131  | 644  | 4  | 3.88E-05 | 0.029  | 0.020  | SEPHS1     |
| chr17 | 75470810  | 75471401  | 592  | 6  | 7.10E-05 | 0.355  | 0.200  | SEPT9      |
| chr17 | 75316383  | 75316784  | 402  | 3  | 0.00147  | 0.404  | 0.292  | SEPT9      |
| chr14 | 94984140  | 94984530  | 391  | 3  | 0.00054  | 0.270  | 0.207  | SERPINA12  |
| chr8  | 8243576   | 8243841   | 266  | 3  | 0.00185  | -0.036 | -0.003 | SGK223     |
| chr11 | 70672365  | 70673256  | 892  | 10 | 1.71E-08 | 0.520  | 0.196  | SHANK2     |
| chr7  | 155599467 | 155599780 | 314  | 3  | 0.00064  | 0.312  | 0.120  | SHH        |
| chr15 | 75747198  | 75747445  | 248  | 2  | 0.00144  | -0.017 | -0.004 | SIN3A      |
| chr1  | 2159351   | 2159373   | 23   | 4  | 0.00284  | 0.032  | 0.019  | SKI        |
| chr12 | 129285354 | 129285402 | 49   | 2  | 0.00369  | 0.246  | 0.170  | SLC15A4    |
| chr11 | 798041    | 799221    | 1181 | 7  | 0.00018  | 0.106  | 0.015  | SLC25A22   |
| chr1  | 172717488 | 172717683 | 196  | 2  | 0.00312  | 0.104  | 0.065  | SLC25A38P1 |
| chr1  | 205897159 | 205897890 | 732  | 4  | 5.67E-05 | 0.144  | 0.095  | SLC26A9    |
| chr3  | 125775413 | 125775693 | 281  | 2  | 0.00241  | 0.184  | 0.125  | SLC41A3    |
| chr8  | 142238452 | 142238504 | 53   | 2  | 0.00474  | 0.170  | 0.130  | SLC45A4    |
| chr3  | 11035079  | 11035357  | 279  | 2  | 0.00037  | 0.146  | 0.060  | SLC6A1     |
| chr16 | 87904547  | 87904580  | 34   | 2  | 0.00054  | 0.191  | 0.185  | SLC7A5     |
| chr1  | 41486908  | 41487437  | 530  | 4  | 3.55E-05 | 0.251  | 0.146  | SLFNL1     |
| chr5  | 168271613 | 168272290 | 678  | 8  | 7.90E-05 | -0.356 | -0.196 | SLIT3      |
| chr16 | 68482144  | 68483021  | 878  | 10 | 1.33E-05 | 0.173  | 0.034  | SMPD3      |
| chr22 | 31477006  | 31477330  | 325  | 7  | 0.00224  | 0.023  | 0.009  | SMTN       |

|       |           |           |      |    |          |        |        |            |
|-------|-----------|-----------|------|----|----------|--------|--------|------------|
| chr1  | 246670199 | 246670859 | 661  | 8  | 1.45E-05 | 0.091  | 0.018  | SMYD3      |
| chr20 | 48599521  | 48599682  | 162  | 5  | 0.00436  | -0.014 | 0.002  | SNAI1      |
| chr7  | 45144074  | 45145334  | 1261 | 12 | 1.96E-10 | 0.238  | 0.104  | SNORA5B    |
| chr3  | 186505240 | 186505347 | 108  | 2  | 0.00206  | 0.323  | 0.249  | SNORA63    |
| chr15 | 25434289  | 25435226  | 938  | 7  | 1.08E-06 | 0.168  | 0.077  | SNORD115   |
| chr15 | 25337644  | 25338219  | 576  | 3  | 0.00023  | 0.135  | 0.101  | SNORD116   |
| chr2  | 238777587 | 238777806 | 220  | 4  | 9.43E-07 | 0.548  | 0.278  | SNORD39.1  |
| chr7  | 2295998   | 2296365   | 368  | 2  | 5.80E-05 | 0.188  | 0.128  | SNX8       |
| chr10 | 97200911  | 97201172  | 262  | 4  | 0.00264  | 0.312  | 0.171  | SORBS1     |
| chr16 | 1031944   | 1032266   | 323  | 3  | 0.00294  | 0.165  | 0.106  | SOX8       |
| chr17 | 45927392  | 45930033  | 2642 | 13 | 2.12E-10 | -0.376 | -0.037 | SP6        |
| chr13 | 24734180  | 24734318  | 139  | 2  | 0.00085  | 0.244  | 0.214  | SPATA13    |
| chr3  | 9233414   | 9234107   | 694  | 3  | 4.71E-07 | 0.251  | 0.164  | SRGAP3-AS2 |
| chr1  | 54724018  | 54724125  | 108  | 2  | 0.00061  | 0.080  | 0.056  | SSBP3      |
| chr12 | 109205201 | 109205487 | 287  | 3  | 7.26E-05 | 0.154  | 0.043  | SSH1       |
| chr3  | 186647950 | 186648285 | 336  | 4  | 5.80E-05 | 0.260  | 0.060  | ST6GAL1    |
| chr7  | 116659609 | 116660240 | 632  | 4  | 0.00014  | 0.358  | 0.101  | ST7        |
| chr17 | 37380697  | 37381273  | 577  | 3  | 1.08E-08 | -0.440 | -0.166 | STAC2      |
| chr4  | 184922382 | 184922406 | 25   | 2  | 0.00457  | -0.369 | -0.361 | STOX2      |
| chr17 | 56429567  | 56430170  | 604  | 8  | 0.0015   | -0.030 | 0.002  | SUPT4H1    |
| chr20 | 58507171  | 58507232  | 62   | 3  | 1.99E-05 | -0.314 | -0.195 | SYCP2      |
| chr6  | 152958649 | 152959047 | 399  | 4  | 0.00102  | 0.275  | 0.072  | SYNE1      |
| chr17 | 76164111  | 76164396  | 286  | 4  | 0.00175  | 0.294  | 0.157  | SYNGR2     |
| chr12 | 118810744 | 118811074 | 331  | 10 | 0.00096  | 0.021  | 0.005  | TAOK3      |
| chr6  | 32821039  | 32821814  | 776  | 18 | 0.00013  | -0.037 | -0.008 | TAP1       |
| chr4  | 37978758  | 37979303  | 546  | 3  | 0.001    | 0.036  | 0.022  | TBC1D1     |
| chr17 | 77923971  | 77924733  | 763  | 8  | 0.0003   | 0.242  | 0.118  | TBC1D16    |
| chr13 | 76055871  | 76056030  | 160  | 3  | 0.00172  | 0.026  | 0.012  | TBC1D4     |
| chr17 | 80882894  | 80883274  | 381  | 3  | 0.00257  | 0.095  | 0.064  | TBCD       |
| chr17 | 80898443  | 80898986  | 544  | 5  | 0.00151  | 0.389  | 0.100  | TBCD       |

|       |           |           |      |    |          |        |        |          |
|-------|-----------|-----------|------|----|----------|--------|--------|----------|
| chr16 | 2021690   | 2022307   | 618  | 10 | 6.71E-05 | -0.031 | -0.007 | TBL3     |
| chr20 | 62694736  | 62695569  | 834  | 4  | 0.00036  | -0.251 | -0.055 | TCEA2    |
| chr20 | 62687969  | 62687986  | 18   | 2  | 0.0029   | 0.301  | 0.259  | TCEA2    |
| chr6  | 31129329  | 31130398  | 1070 | 18 | 6.27E-05 | 0.186  | 0.067  | TCF19    |
| chr11 | 67809980  | 67810742  | 763  | 7  | 0.00031  | 0.142  | 0.058  | TCIRG1   |
| chr2  | 105946563 | 105946882 | 320  | 4  | 0.00213  | 0.222  | 0.034  | TGFBRAP1 |
| chr20 | 35201208  | 35202059  | 852  | 7  | 0.00037  | 0.182  | 0.036  | TGIF2    |
| chr17 | 38219361  | 38220298  | 938  | 5  | 0.0003   | -0.316 | -0.062 | THRA     |
| chr17 | 1613017   | 1613239   | 223  | 2  | 0.0003   | 0.223  | 0.118  | TLCD2    |
| chr10 | 98273510  | 98274264  | 755  | 8  | 0.00062  | 0.081  | 0.021  | TLL2     |
| chr1  | 223316219 | 223316927 | 709  | 9  | 0.00017  | 0.114  | 0.025  | TLR5     |
| chr3  | 129407365 | 129407548 | 184  | 5  | 7.60E-06 | 0.198  | 0.170  | TMCC1    |
| chr17 | 53800372  | 53800554  | 183  | 3  | 0.00475  | 0.334  | 0.246  | TMEM100  |
| chr1  | 1476269   | 1476845   | 577  | 4  | 0.00017  | -0.152 | 0.023  | TMEM240  |
| chr2  | 120189622 | 120190297 | 676  | 5  | 8.10E-07 | -0.209 | 0.014  | TMEM37   |
| chr1  | 1850414   | 1851416   | 1003 | 15 | 0.00039  | 0.121  | 0.021  | TMEM52   |
| chr16 | 426713    | 427084    | 372  | 3  | 0.00117  | 0.073  | 0.030  | TMEM8A   |
| chr6  | 31544931  | 31545898  | 968  | 10 | 0.00018  | 0.163  | 0.089  | TNF      |
| chr11 | 128812462 | 128813470 | 1009 | 15 | 1.27E-07 | 0.378  | 0.099  | TP53AIP1 |
| chr1  | 3662685   | 3663705   | 1021 | 7  | 0.00011  | -0.154 | -0.034 | TP73-AS1 |
| chr3  | 127311038 | 127311169 | 132  | 3  | 0.00024  | 0.334  | 0.100  | TPRA1    |
| chr3  | 127299170 | 127299831 | 662  | 4  | 0.00033  | 0.212  | 0.076  | TPRA1    |
| chr13 | 45945197  | 45945362  | 166  | 3  | 0.00089  | 0.168  | 0.140  | TPT1-AS1 |
| chr17 | 7836533   | 7836610   | 78   | 3  | 0.00304  | 0.181  | 0.064  | TRAPPC1  |
| chr6  | 116866658 | 116867006 | 349  | 3  | 0.00406  | 0.293  | 0.233  | TRAPPC3L |
| chr8  | 141248988 | 141249094 | 107  | 2  | 0.00058  | 0.180  | 0.147  | TRAPPC9  |
| chr19 | 59055873  | 59056208  | 336  | 2  | 0.00399  | 0.008  | 0.005  | TRIM28   |
| chr1  | 33646902  | 33647028  | 127  | 2  | 0.00371  | -0.015 | -0.002 | TRIM62   |
| chr20 | 33681070  | 33681223  | 154  | 2  | 0.00225  | -0.173 | -0.158 | TRPC4AP  |
| chr17 | 3438857   | 3439372   | 516  | 7  | 0.00055  | 0.238  | 0.063  | TRPV3    |



|       |           |           |      |    |          |        |        |                  |
|-------|-----------|-----------|------|----|----------|--------|--------|------------------|
| chr8  | 143436137 | 143436205 | 69   | 2  | 0.00091  | 0.181  | 0.142  | TSNARE1          |
| chr1  | 231663393 | 231663886 | 494  | 2  | 0.00135  | 0.290  | 0.154  | TSNAX            |
| chr11 | 2321770   | 2322050   | 281  | 8  | 0.0006   | 0.240  | 0.087  | TSPAN32          |
| chr11 | 2422520   | 2422730   | 211  | 10 | 0.00372  | -0.051 | -0.003 | TSSC4            |
| chr2  | 179396688 | 179397513 | 826  | 7  | 1.49E-05 | 0.095  | 0.047  | TTN-AS1          |
| chr15 | 41851964  | 41851969  | 6    | 2  | 0.00452  | 0.034  | 0.031  | TYRO3            |
| chr16 | 4665248   | 4666047   | 800  | 5  | 2.06E-07 | -0.266 | -0.136 | UBALD1           |
| chr17 | 16282382  | 16282434  | 53   | 3  | 0.0008   | 0.127  | 0.090  | UBB              |
| chr5  | 176292536 | 176292607 | 72   | 3  | 0.00093  | 0.277  | 0.184  | UNC5A            |
| chr11 | 67764320  | 67765720  | 1401 | 7  | 1.41E-06 | 0.276  | 0.096  | UNC93B1          |
| chr15 | 63893412  | 63893530  | 119  | 2  | 0.0015   | 0.030  | 0.017  | USP3-AS1         |
| chr1  | 160388964 | 160389104 | 141  | 2  | 0.00464  | 0.127  | 0.102  | VANGL2           |
| chr10 | 135050326 | 135051022 | 697  | 17 | 0.00087  | 0.096  | 0.009  | VENTX            |
| chr3  | 11763045  | 11763340  | 296  | 3  | 0.00125  | 0.278  | 0.225  | VGLL4            |
| chr8  | 145654780 | 145654854 | 75   | 2  | 0.00408  | -0.212 | -0.182 | VPS28            |
| chr6  | 33235504  | 33235977  | 474  | 7  | 0.00055  | 0.163  | 0.059  | VPS52            |
| chr16 | 699218    | 699775    | 558  | 7  | 2.74E-05 | -0.026 | 0.000  | WDR90            |
| chr16 | 703597    | 704060    | 464  | 5  | 0.00038  | -0.122 | -0.004 | WDR90            |
| chr16 | 678562    | 678891    | 330  | 2  | 0.00016  | 0.201  | 0.116  | WFIKKN1          |
| chr22 | 46366859  | 46368025  | 1167 | 5  | 3.00E-10 | 0.662  | 0.446  | WNT7B            |
| chr16 | 69958626  | 69958964  | 339  | 4  | 0.00242  | 0.372  | 0.274  | WWP2             |
| chr19 | 7694013   | 7694688   | 676  | 11 | 0.00023  | -0.035 | -0.005 | XAB2             |
| chr6  | 169689773 | 169689939 | 167  | 3  | 2.77E-08 | 0.482  | 0.184  | XXyac-YX65C7_A.3 |
| chr6  | 31370412  | 31371967  | 1556 | 43 | 0.00011  | 0.094  | 0.002  | Y_RNA.22         |
| chr1  | 207224102 | 207225647 | 1546 | 12 | 1.12E-08 | 0.200  | 0.077  | YOD1             |
| chr6  | 31869301  | 31869443  | 143  | 3  | 0.00448  | 0.019  | 0.015  | ZBTB12           |
| chr6  | 33286540  | 33287248  | 709  | 8  | 0.00028  | 0.225  | 0.087  | ZBTB22           |
| chr14 | 105268492 | 105269174 | 683  | 5  | 0.0006   | -0.373 | -0.226 | ZBTB42           |
| chr7  | 1199841   | 1200356   | 516  | 8  | 0.00214  | 0.024  | 0.009  | ZFAND2A          |

|       |           |           |     |   |         |        |        |         |
|-------|-----------|-----------|-----|---|---------|--------|--------|---------|
| chr16 | 89788035  | 89788316  | 282 | 2 | 0.00046 | 0.013  | 0.009  | ZNF276  |
| chr1  | 200378667 | 200379235 | 569 | 6 | 0.00215 | -0.103 | -0.015 | ZNF281  |
| chr19 | 58596723  | 58597097  | 375 | 3 | 0.00254 | 0.157  | 0.095  | ZSCAN18 |

**S3 Table: Summary of the 28 DNA regions differentially methylated between donors with and without asthma when pronase and bronchial brush isolated cells are combined in a single analysis.**

| Chromosome Location | Start Location   | End Location     | Region Width | Number of CpGs | Minimum FDR     | Max. difference in $\beta$ value | Mean difference in $\beta$ value | Overlapping Promoters                     |
|---------------------|------------------|------------------|--------------|----------------|-----------------|----------------------------------|----------------------------------|-------------------------------------------|
| chr7                | 1581583          | 1582222          | 640          | 4              | 5.88E-07        | -0.15                            | -0.03                            | AC093734.1                                |
| chr5                | 2754240          | 2755158          | 919          | 6              | 0.00202364      | 0.24                             | 0.14                             | C5orf38-001                               |
| chr11               | 64951536         | 64952354         | 819          | 6              | 0.000402        | 0.15                             | 0.09                             | CAPN1                                     |
| chr13               | 36871646         | 36872346         | 701          | 13             | 0.000402        | -0.05                            | -0.03                            | CCDC169,<br>CCDC169-<br>SOHLH2,<br>SOHLH2 |
| chr2                | 130897120        | 130897302        | 183          | 3              | 0.001548832     | 0.21                             | 0.16                             | CCDC74B                                   |
| <i>chr6</i>         | <i>291687</i>    | <i>292823</i>    | <i>1137</i>  | <i>9</i>       | <i>3.97E-05</i> | <i>0.17</i>                      | <i>0.13</i>                      | <i>DUSP22</i>                             |
| <b>chr10</b>        | <b>123353298</b> | <b>123354171</b> | <b>874</b>   | <b>13</b>      | <b>4.45E-10</b> | <b>0.15</b>                      | <b>0.12</b>                      | <b>FGFR2</b>                              |
| <b>chr6</b>         | <b>101846409</b> | <b>101847706</b> | <b>1298</b>  | <b>18</b>      | <b>1.30E-10</b> | <b>0.28</b>                      | <b>0.17</b>                      | <b>GRIK2</b>                              |
| chr12               | 6881118          | 6882083          | 966          | 9              | 0.000360835     | -0.18                            | -0.10                            | LAG3                                      |
| chr17               | 66194621         | 66194797         | 177          | 5              | 0.002748163     | 0.16                             | 0.12                             | LOC440461                                 |
| chr13               | 36050158         | 36051073         | 916          | 9              | 0.000402        | 0.21                             | 0.18                             | MAB21L1,<br>NBEA-203                      |

|              |                  |                  |            |          |                    |              |              |                         |
|--------------|------------------|------------------|------------|----------|--------------------|--------------|--------------|-------------------------|
| chr15        | 23810861         | 23811205         | 345        | 2        | 0.002630989        | 0.10         | 0.09         | MKRN3                   |
| chr10        | 530635           | 531584           | 950        | 12       | 0.000289991        | -0.17        | -0.09        | NA                      |
| chr15        | 70326224         | 70326230         | 7          | 2        | 0.003989859        | 0.22         | 0.18         | NA                      |
| chr17        | 45944339         | 45944464         | 126        | 3        | 0.000402           | 0.11         | 0.06         | NA                      |
| chr6         | 30122523         | 30122593         | 71         | 4        | 0.001604623        | 0.23         | 0.19         | NA                      |
| chr6         | 169567826        | 169569137        | 1312       | 6        | 0.000909561        | -0.10        | -0.03        | NA                      |
| <b>chr7</b>  | <b>113722758</b> | <b>113723162</b> | <b>405</b> | <b>4</b> | <b>0.001236086</b> | <b>0.24</b>  | <b>0.21</b>  | <b>NA</b>               |
| chr7         | 4832112          | 4832535          | 424        | 5        | 0.000293169        | 0.16         | 0.13         | NA                      |
| <b>chr8</b>  | <b>1906338</b>   | <b>1906498</b>   | <b>161</b> | <b>3</b> | <b>0.000486283</b> | <b>0.28</b>  | <b>0.22</b>  | <b>NA</b>               |
| chr4         | 72897565         | 72898212         | 648        | 6        | 0.000326774        | -0.14        | -0.11        | NPFFR2                  |
| <b>chr17</b> | <b>45927392</b>  | <b>45928077</b>  | <b>686</b> | <b>3</b> | <b>0.000563631</b> | <b>0.16</b>  | <b>0.13</b>  | <b>SP6</b>              |
| chr6         | 134210138        | 134210279        | 142        | 5        | 0.004776081        | -0.20        | -0.09        | TCF21, RP3-<br>323P13.2 |
| chr11        | 59633874         | 59634276         | 403        | 4        | 0.000866335        | 0.27         | 0.17         | TCN1                    |
| <u>chr15</u> | <u>91473059</u>  | <u>91473569</u>  | <u>511</u> | <u>8</u> | <u>1.19E-08</u>    | <u>-0.17</u> | <u>-0.07</u> | <u>UNC45A</u>           |
| chr5         | 135415258        | 135416613        | 1356       | 15       | 2.35E-06           | 0.20         | 0.14         | VTRNA2                  |
| chr3         | 113160183        | 113160637        | 455        | 8        | 0.00032984         | 0.12         | 0.09         | WDR52                   |
| chr17        | 48912483         | 48912764         | 282        | 8        | 0.003513907        | 0.16         | 0.09         | WFIKKN2                 |
| chr20        | 5485144          | 5485873          | 730        | 9        | 2.37E-76           | 0.28         | 0.18         | LINC00654               |
| chr17        | 4804674          | 4804838          | 165        | 2        | 2.97E-21           | -0.17        | -0.16        | CHRNE,<br>C17orf107     |
| chr6         | 101846409        | 101847706        | 1298       | 18       | 9.24E-33           | -0.33        | -0.21        | GRIK2                   |
| chr22        | 17680477         | 17680706         | 230        | 8        | 7.21E-19           | 0.18         | 0.11         | CECR1                   |
| chr2         | 15804917         | 15805012         | 96         | 3        | 2.28E-19           | -0.13        | -0.08        | NA                      |
| chr6         | 134210279        | 134210307        | 29         | 2        | 1.15E-18           | 0.09         | 0.08         | TCF21                   |

|      |          |          |      |    |          |       |       |        |
|------|----------|----------|------|----|----------|-------|-------|--------|
| chr6 | 29520965 | 29521803 | 839  | 31 | 1.77E-30 | 0.23  | 0.13  | OR2I1P |
| chr6 | 33287809 | 33289280 | 1472 | 32 | 2.85E-55 | 0.31  | 0.13  | DAXX   |
| chr1 | 40105664 | 40105764 | 101  | 5  | 1.93E-19 | -0.16 | -0.07 | HEYL   |

**S4 Table: Comparison of regions overlapping between the combined analysis and the analyses on distinct isolation techniques.**

| Region Gene                  | Combined Region: |                     |                      |                     |
|------------------------------|------------------|---------------------|----------------------|---------------------|
|                              | Size             | Max beta difference | Mean beta difference | Direction of change |
| <b>FGFR2</b>                 | <b>Equal</b>     | <b>Smaller</b>      | <b>Smaller</b>       | <b>Same</b>         |
| <b>GRIK2</b>                 | <b>Larger</b>    | <b>Smaller</b>      | <b>Smaller</b>       | <b>Same</b>         |
| <b>LAG3</b>                  | <b>Equal</b>     | <b>Smaller</b>      | <b>Smaller</b>       | <b>Same</b>         |
| <b>LOC440461</b>             | <b>Smaller</b>   | <b>Smaller</b>      | <b>Larger</b>        | <b>Same</b>         |
| <b>MAB21L1,<br/>NBEA-203</b> | <b>Smaller</b>   | <b>Smaller</b>      | <b>Smaller</b>       | <b>Same</b>         |
| <b>NA</b>                    | <b>Smaller</b>   | <b>Smaller</b>      | <b>Smaller</b>       | <b>Same</b>         |
| <b>NA</b>                    | <b>Equal</b>     | <b>Smaller</b>      | <b>Smaller</b>       | <b>Same</b>         |
| <b>SP6</b>                   | <b>Smaller</b>   | <b>Smaller</b>      | <b>Larger</b>        | <b>Opposite</b>     |
| <u>UNC45A</u>                | <u>Equal</u>     | <u>Larger</u>       | <u>Larger</u>        | <u>Same</u>         |
| <u>DUSP22</u>                | <u>Smaller</u>   | <u>Smaller</u>      | <u>Smaller</u>       | <u>Same</u>         |
